1 **Changes in splicing and neuromodulatory gene**  
2 **expression programs in sensory neurons with**  
3 **pheromone signaling and social experience**

4 Deanhardt Bryson<sup>1\*</sup>, Duan Qichen<sup>2\*</sup>, Du Chengcheng<sup>2</sup>, Soeder Charles<sup>3</sup>, Jones Corbin<sup>3</sup>,  
5 Volkan Pelin C.<sup>1,2†</sup>

6 <sup>1</sup>Duke University, Department of Neurobiology

7 <sup>2</sup>Duke University, Department of Biology

8 <sup>3</sup>University of Chapel Hill, Department of Biology

9 \*These authors contributed equally

10 †Corresponding Author

11

12 **Abstract**

13 Social experience and pheromone signaling in ORNs affect pheromone responses and male  
14 courtship behaviors in *Drosophila*, however, the molecular mechanisms underlying this circuit-  
15 level neuromodulation remain less clear. Previous studies identified social experience and  
16 pheromone signaling-dependent modulation of chromatin around behavioral switch gene  
17 *fruitless*, which encodes a transcription factor necessary and sufficient for male behaviors. To  
18 identify the molecular mechanisms driving social experience-dependent neuromodulation, we  
19 performed RNA-seq from antennal samples of mutant fruit flies in pheromone receptors and  
20 *fruitless*, as well as grouped or isolated wild-type males. We found that loss of pheromone

21 detection differentially alters the levels of *fruitless* exons suggesting changes in splicing  
22 patterns. In addition, many *Fruitless* target neuromodulatory genes, such as neurotransmitter  
23 receptors, ion channels, and ion transporters, are differentially regulated by social context and  
24 pheromone signaling. Our results suggest that modulation of circuit activity and behaviors in  
25 response to social experience and pheromone signaling arise due to changes in transcriptional  
26 programs for neuromodulators downstream of behavioral switch gene function.

27

## 28 **Introduction**

29 Detection of the social environment through pheromone signaling is critical for animals to  
30 recalibrate sex-specific behaviors such as mating and aggression (Curley et al., 2011; Cushing  
31 and Kramer, 2005; Dey et al., 2015; Sethi et al., 2019). It is thought that changes in social  
32 environment can modify the regulation of genes necessary for neuronal homeostasis,  
33 physiology, and transmission, ultimately affecting circuit function and behaviors (Cushing and  
34 Kramer, 2005; Flavell and Greenberg, 2008; West and Greenberg, 2011). Previous studies on  
35 the effects of early life experience have identified changes in neuroanatomy, synaptic plasticity,  
36 neurotransmission, and gene expression. For example, maternal licking and grooming of pups,  
37 increases DNA methylation around glucocorticoid receptor gene, leading to long-lasting effects  
38 on offspring stress responses and behaviors (McGowan et al., 2009; Mifsud et al., 2011;  
39 Weaver et al., 2004). However, transcriptional cascades driving in sensory and social  
40 experience-dependent modulation of gene expression, circuit function, and behaviors remain  
41 unclear.

42 Identifying gene regulation cascades by which social signals influence neural and behavioral  
43 responses requires a model system with well-defined circuits and genetic regulators with roles

44 in neurophysiology, circuit structure, and behavioral function. Courtship circuit and behavior in  
45 *Drosophila melanogaster* is an excellent and unique model that provides an experimental  
46 system to address this question. In *Drosophila*, male-specific courtship behaviors are governed  
47 by a master transcriptional regulator Fruitless<sup>M</sup> (Fru<sup>M</sup>), which is encoded by male-specific  
48 alternative splicing of the *fruitless* (*fru*) gene from the P1 promoter (Dickson, 2008; Yamamoto  
49 and Koganezawa, 2013). It is known that Fru<sup>M</sup> is both necessary and sufficient for male  
50 courtship as loss of Fru<sup>M</sup> in males leads to a loss of male-female-specific courtship interaction  
51 (Demir and Dickson, 2005; Ryner et al., 1996; Von Philipsborn et al., 2014). Fru<sup>M</sup> is expressed  
52 in approximately 2000 interconnected neurons throughout the peripheral and central nervous  
53 system and its expression is required for the development, function, and plasticity of the circuit  
54 which drives male-specific behaviors (Yamamoto and Kohatsu, 2017). In particular, social cues  
55 such as pheromones can affect courtship behaviors in males (Dweck et al., 2015; Kurtovic et  
56 al., 2007; Lin et al., 2016; van der Goes van Naters and Carlson, 2007; Yamamoto et al., 2013;  
57 Yan et al., 2020). Two types of these pheromones, male-specific pheromone *cis*-vaccenyl  
58 acetate and non-sex-specific pheromones (such as methyl laurate and palmitoleic acid),  
59 activate Fru<sup>M</sup>-positive olfactory receptor neurons (ORNs) expressing Or67d and Or47b  
60 receptors, respectively (Dweck et al., 2015; Kurtovic et al., 2007; Lin et al., 2016). These two  
61 ORN classes act differently, with Or67d regulating male-male repulsive behaviors and  
62 aggression, whereas Or47b functioning to drive male-courtship advantage with age and social  
63 experience (Dweck et al., 2015; Lin et al., 2016; Sethi et al., 2019; Wang et al., 2011).

64 Previous studies have reported that different social contexts, as well as loss of Or47b or Or67d  
65 function, alter the regulation of *fru* transcription, particularly the enrichment of active chromatin  
66 marks around *fru* promoters (Hueston et al., 2016; Zhao et al., 2020). In addition, the expression  
67 of *fru*<sup>M</sup> isoforms in Or47b and Or67d ORNs affects physiological responses to pheromone  
68 ligands and courtship behaviors (Lin et al., 2016; Ng et al., 2019; Sethi et al., 2019; Zhang and

69 Su, 2020). It is likely that changes in social context, pheromone signaling, as well as  
70 subsequent changes in *fru* regulation, affect the expression of ion channels as well as  
71 neurotransmitter receptors with functions regulating neurophysiology. Indeed, Fru<sup>M</sup> binding is  
72 detected upstream of many ion channels and genes controlling neural development and  
73 function in the central brain (Nojima et al., 2014; Vernes, 2014). Even though these studies  
74 point to the regulation of neuronal and circuit function by Fru<sup>M</sup>, very little is known about how it  
75 affects the expression of these target genes, or how pheromone signaling and social experience  
76 affect transcriptional programs by modulating Fru<sup>M</sup>.

77 Here we performed antennal RNA-seq to determine transcriptional changes in response to  
78 social isolation and disrupted pheromone receptor signaling or Fru<sup>M</sup> function. Our results show  
79 that *fru* splicing patterns are also modified in pheromone receptor mutants. We also found that  
80 transcriptional programs associated with neuromodulation are altered. Many of the Fru<sup>M</sup> target  
81 neuromodulatory genes are misregulated in the same direction in *fru<sup>M</sup>* and pheromone receptor  
82 mutants. These results uncover a gene regulatory cascade from pheromone receptors to *fru*  
83 regulation, which alter neuromodulatory transcriptional programs to ultimately modulate  
84 neuronal and circuit responses in different social contexts.

85

## 86 **Neuronal transcriptional programs are modulated with social** 87 **isolation and lack of pheromone receptors or Fru<sup>M</sup> function.**

88 To identify genes regulated in the peripheral olfactory system by social experience, pheromone  
89 signaling, and Fru<sup>M</sup>, we utilized RNA-seq from whole antennae of 7-day old wild-type (*w<sup>1118</sup>*)  
90 males that are either group-housed (*w<sup>1118</sup> GH*) or single-housed (*w<sup>1118</sup> SH*), as well as group-  
91 housed *Or47b* mutant males (*Or47b<sup>1</sup>*), *Or67d* mutant males (*Or67d<sup>GAL4</sup>*), and *fru<sup>M</sup>* mutant males

92 (*fru<sup>LexA</sup>/fru<sup>4-40</sup>*) (Figure 1A). Each condition included 3 biological replicates except for *fru<sup>LexA</sup>/fru<sup>4-40</sup>*  
93 with only two (Figure 1B). Each sample had mapped reads ranging between 24 and 40 million  
94 and hierarchical clustering analysis based on Pearson's correlation between samples shows  
95 consistency among replicates within the same genotype (Figure 1B). Principal component  
96 analysis (PCA) also shows the expected grouping of the replicates belonging to the same  
97 condition, across the first two principal components (PC) accounting for most of the overall  
98 variance (32% and 19%) (Figure 1C). We also found that gene expression changes were more  
99 similar among *Or67d*, *Or47b*, and *fru<sup>M</sup>* mutants, compared to grouped or isolated wild-type male  
100 antennae (Figure 1B,C). As expected, expression levels of *Or47b*, *Or67d*, and male-specific *fru*  
101 exon are significantly lower in all replicates for *Or47b*, *Or67d*, and *fru<sup>M</sup>* mutants, respectively,  
102 though the changes of the whole *fru* gene locus cannot be detected (Figure 1D; Figure 4B),  
103 validating genotype-specific changes in each condition. In addition, genes known to be absent  
104 in adult antennae, such as *amos* (Goulding et al., 2000; Li et al., 2016; zur Lage et al., 2003),  
105 also show nearly no expression, whereas housekeeping genes, like *Act5C*, *Gapdh2*, *Rpl118*,  
106 *fl(2)d*, and *wkd*, show nearly identical expression across all samples (Figure 1D). These results  
107 point to high RNA-seq data quality across sample groups and within biological replicates.

108

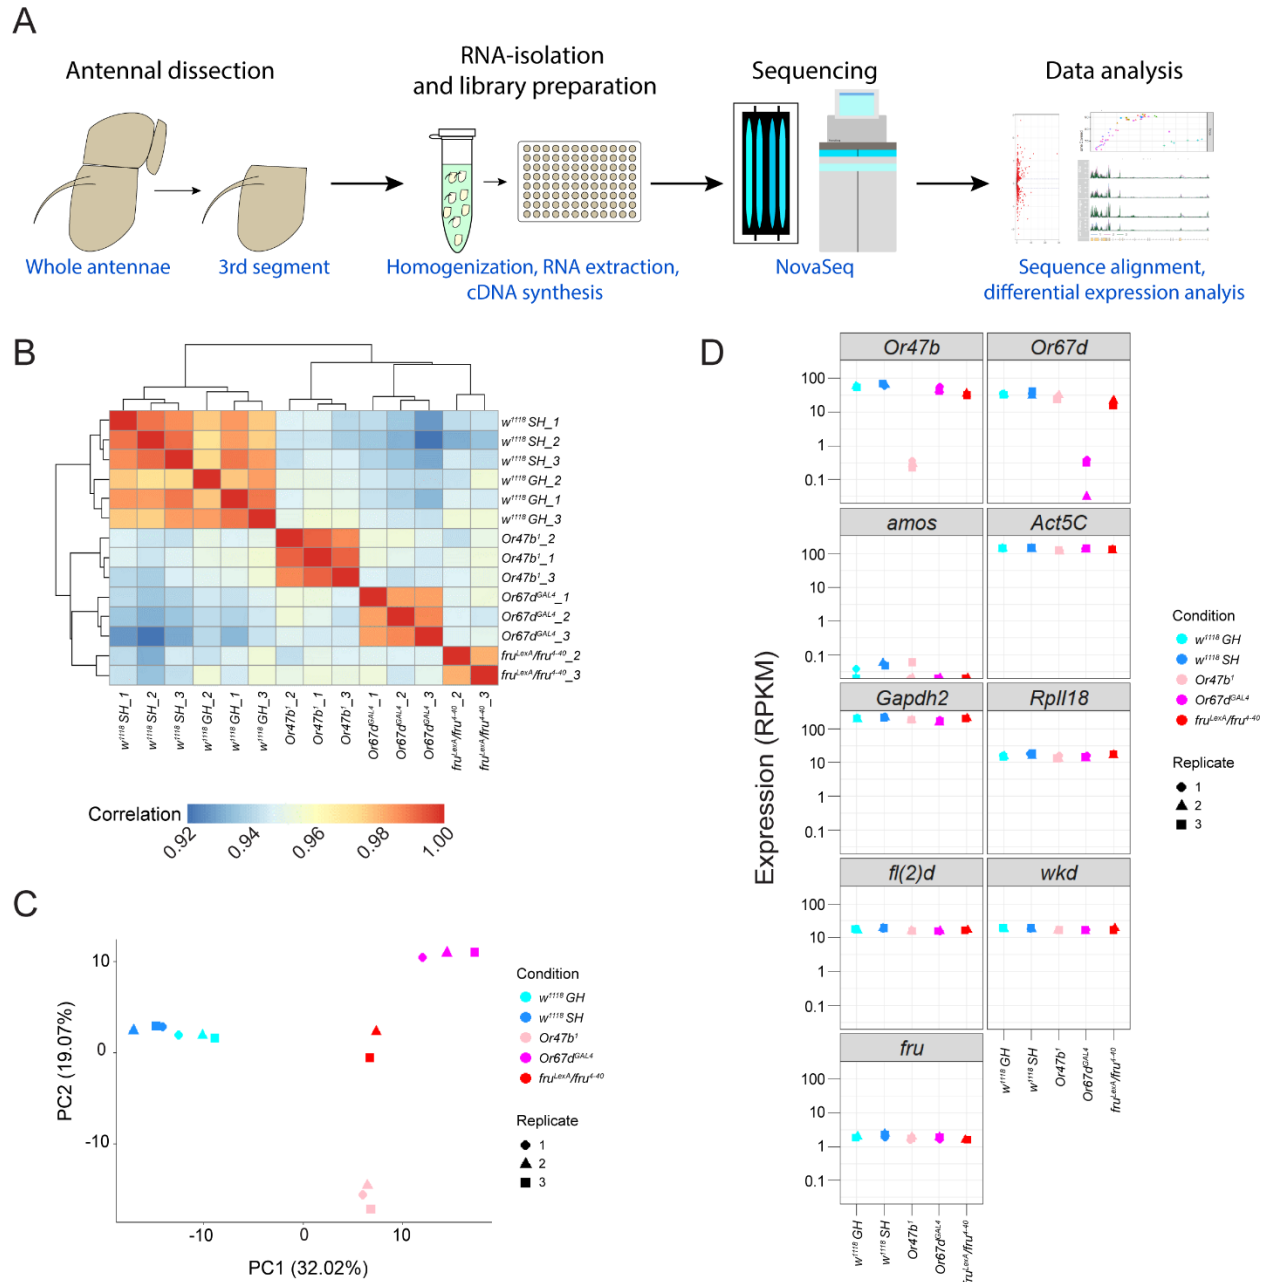

109

110 **Figure 1. Overview of RNA-seq samples from male antennae.** (A) schematic for antennal  
 111 RNA-seq workflow. (B-C) Hierarchical clustering based on Pearson's correlation matrix (B) and  
 112 PCA analysis (C) of transcriptional profiles among biological replicates from antennae of wild-  
 113 type group-housed ( $w^{1118} GH$ ), single housed ( $w^{1118} SH$ ), and group-housed  $Or47b^1$ ,  $Or67d^{GAL4}$ ,  
 114 and  $fru^{LexA}/fru^{4-0}$  mutant male flies. (D) Transcript levels for several representative negative and  
 115 positive control genes among all samples.

116 We then ran the differential expression analysis to globally examine the transcriptional changes  
117 upon loss of social expression, pheromone sensing, or Fru<sup>M</sup> function. Compared to group-  
118 housed wild-type antennae, social isolation has the least number of significantly altered genes,  
119 whereas group-housed *fru<sup>M</sup>* mutants resulted in the highest number of significantly differential  
120 gene expression (Figure 2A-C). Pairwise comparisons of social deprivation and lack of  
121 pheromone receptors/Fru<sup>M</sup> function demonstrate the social experience/*Or47b*/*Or67d*/Fru<sup>M</sup>-  
122 dependent transcriptional programs, and notably reveal that the genes co-regulated by  
123 pheromone receptors and Fru<sup>M</sup> tend to behave in the same direction in the corresponding  
124 mutants (Figure 2A,D), suggesting the shared downstream signaling pathways upon pheromone  
125 receptor activation and Fru<sup>M</sup>-dependent regulation. The numbers of genes with significant  
126 differential expression in the same direction shared by each condition compared to the group-  
127 housed wild types are illustrated in a Venn diagram and Upset plot (Figure 2B,C), where genes  
128 with overlapping changes in social isolation and *Or47b*, *Or67d*, and *fru<sup>M</sup>* mutants are  
129 highlighted. Particularly, only one gene, *CG13659*, an ecdysteroid kinase-like domain encoding  
130 gene, is consistently changed across all experimental conditions compared to antennae from  
131 the group-housed wild-type males (Figure 2B).

132 Hierarchical cluster analysis of log<sub>2</sub> fold change versus group-housed wild-type samples shows  
133 changes in *fru<sup>M</sup>* and *Or67d* mutants as being the most comparable, with single-housed wild  
134 types being an outlier of the four groups (Figure 2E). We found that no cluster has a specific  
135 bias towards low, medium, or high expression of genes (Figure 2E). Cluster analysis identified  
136 several genes of behavioral, neuromodulatory, and developmental importance such as  
137 *Cytochrome p450 6a20* (*Cyp6a20*), *serotonin receptor 2A* (*5-HT2A*), *Juvenile hormone esterase*  
138 (*Jhe*), and *Dpr-interacting protein alpha* (*DIP-alpha*) (Figure 2E) (Carrillo et al., 2015; Johnson et  
139 al., 2009; Liu et al., 2008; Wang et al., 2008). Among these, antennal expression of *Cyp6a20*,  
140 which is downregulated in *Or47b*, *Or67d*, and *fru<sup>M</sup>* mutants, was previously shown to mediate

141 effects of social experience on male-male aggression (Figure 2E) (Wang et al., 2008). On the  
142 other hand, *Cyp4p2*, which is involved in hormone metabolism and insecticide detoxification  
143 (Scanlan et al., 2020; Seong et al., 2019, 2018), is only misregulated in *Or47b* mutants (Figure  
144 2E). In addition to the downregulated genes, we also found some genes encoding ion channels  
145 and neurotransmitter receptors that show significant upregulation (*ppk25* and *GluRIIa*) (Figure  
146 2E). The heatmap for gene expression changes revealed gene clusters that are co-regulated by  
147 pheromone receptors and Fru<sup>M</sup>, in addition to gene clusters that are uniquely regulated by each  
148 OR and Fru<sup>M</sup>; this again highlights that the co-regulated genes tend to change in the same  
149 direction in pheromone receptor and *fru* mutants.

150



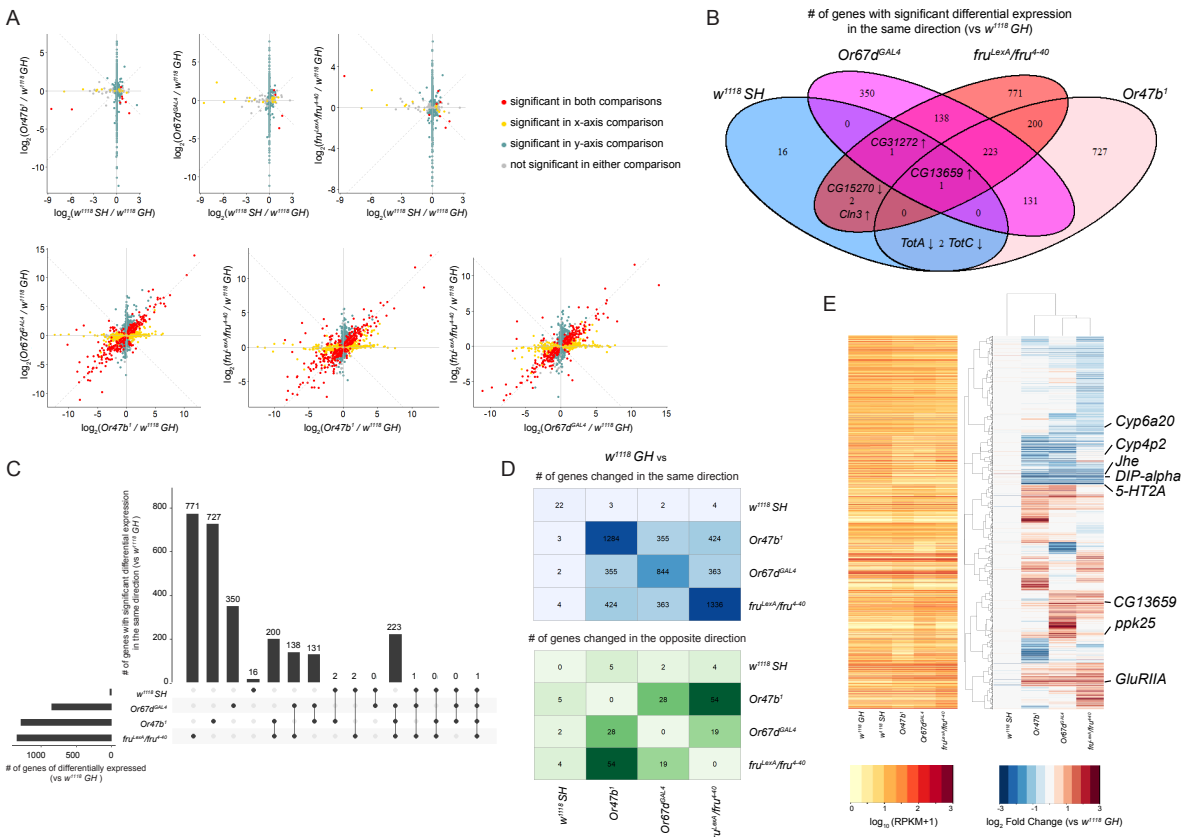

151

152 **Figure 2. Differentially expressed genes in response to loss of social experience,**

153 **pheromone receptors, or fru<sup>M</sup>. (A)** Scatter plot showing the genes that are differentially

154 regulated among social isolation, and mutants in pheromone receptors and fru<sup>M</sup>. Significance is

155 defined by adjusted p-value below 0.01 after applying Bonferroni correction with n = 2. (B-C)

156 Venn diagram (B) and UpSet plot (C) comparing differentially expressed genes shared across

157 experimental conditions (only genes changed in the same direction). (D) Numbers of

158 differentially expressed genes with the same (top) and the opposite (bottom) direction in

159 pairwise comparison of experimental conditions versus group-housed wild-type samples. In (B-

160 D), significance is defined by adjusted p-value below 0.01 after applying Bonferroni correction

161 with n = 4. (E) Hierarchically clustered heatmaps showing log<sub>2</sub> fold change compared to group-

162 housed wild-type antennae across all experimental conditions (right) and average mRNA levels

163 (RPKM) of replicates within each condition ordered in the same way as log<sub>2</sub> fold change (left).

164 Only 2999 genes with at least one significant (adjusted p-value below 0.01) change between an  
165 experimental condition versus group-housed wild types are shown.

166

167 **Gene ontology terms for differentially expressed genes in**  
168 **response to lack of social and pheromone signaling highlight**  
169 **neuromodulators**

170 Previous work has demonstrated that social experience, pheromone signaling, and Fru<sup>M</sup> activity  
171 can regulate the responsiveness of pheromone sensing ORNs to modify circuit function and  
172 behavior (Dweck et al., 2015; Kurtovic et al., 2007; Lin et al., 2016; Liu et al., 2011; Sethi et al.,  
173 2019; Wang et al., 2008). To functionally understand system-level changes in gene expression  
174 with social isolation, lack of pheromone signaling, and *fru*<sup>M</sup> mutants, we next investigated gene  
175 ontology (GO) terms using GOrilla for the list of differentially expressed genes in each  
176 experimental condition in pairwise comparisons with group-housed wild types (Eden et al.,  
177 2009, 2007) (Figure 3). Many GO terms of molecular function and biological process are  
178 commonly affected across multiple experimental groups, suggesting the converging  
179 downstream molecular events in response to social experience and pheromone sensing  
180 mediated by Fru<sup>M</sup> activity (Figure 3). Strikingly, the genes with the altered expression tend to be  
181 localized on the cell membrane (Figure 3, GO: cellular component) and have functions in ion  
182 transport across membrane (Figure 3, GO: molecular function), and appear to be involved in the  
183 process of detecting and responding to olfactory stimuli (Figure 3, GO: biological process). This  
184 supports previous studies in providing a general mechanism for social experience, pheromone  
185 receptor signaling, and Fru<sup>M</sup>-dependent regulation of pheromone responsiveness of Or47b  
186 ORNs (Sethi et al., 2019; Zhang et al., 2020; Zhao et al., 2020). Furthermore, genes with  
187 oxidoreductase activity also have overlapping alterations across *Or47b*, *Or67d*, and *fru*<sup>M</sup>  
188 mutants, and many of these appear to contribute to insect hormone metabolism (Figure 3, GO:  
189 molecular function). Interestingly, previously studies reported that juvenile hormone signaling  
190 works together with social experience in olfactory receptor neurons to modulate chromatin

191 around *fru* locus [4,20]. Our RNA-seq results also add an additional layer of complexity to  
192 hormone-social experience interactions, as social experience and pheromone signaling affects  
193 the levels of certain hormones by modifying hormone metabolism dynamics. In summary, social  
194 isolation, disrupted pheromone receptor signaling, and lack of Fru<sup>M</sup> function in peripheral  
195 olfactory sensory neurons affect the expression of many genes with roles in diverse aspects of  
196 neurophysiology, including neuronal responsiveness, ion transmembrane transport, and  
197 beyond.

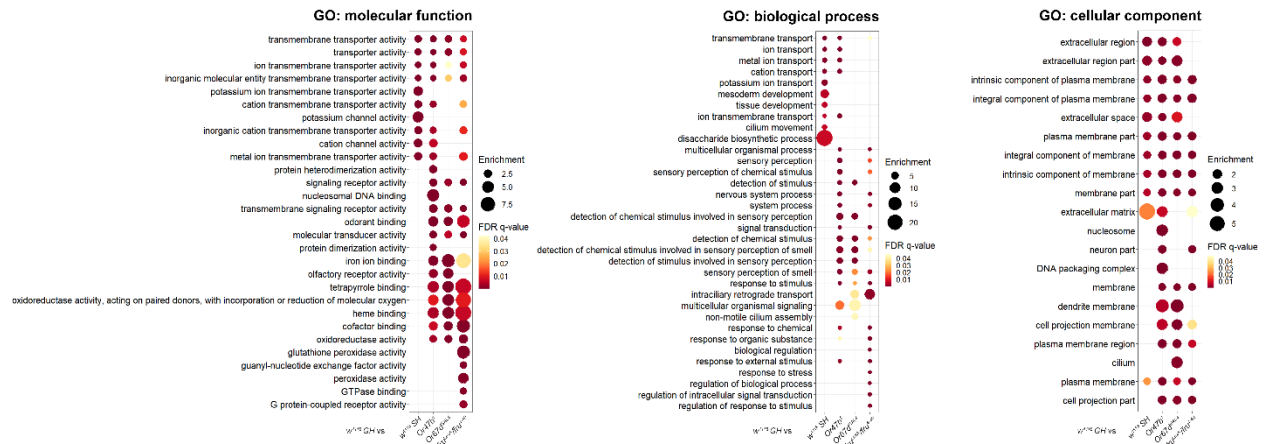

198

199 **Figure 3. Top enriched gene ontology (GO) terms for differentially expressed genes in**  
 200 **response to social experience, pheromone signaling, and Fru<sup>M</sup> activity.** The union set of  
 201 top 10 most significantly enriched GO terms with FDR q-value below 0.05 of the differentially  
 202 expressed genes in each experimental condition is shown. Enriched GO terms were generated  
 203 by the single ranked gene list with the smallest adjusted p-value at the top via GOrilla.

204

205

## 206 **Loss of pheromone signaling alters *fruitless* splicing** 207 **patterns**

208 *Fruitless* locus generates multiple alternative splice isoforms for RNAs transcribed from 7  
209 promoters (P1-P6, PD). The transcripts from *fru P1* are alternatively spliced between males and  
210 females, where the male, but not the female, isoform (*fru<sup>M</sup>*) encodes functional proteins  
211 (Dickson, 2008; Yamamoto and Koganezawa, 2013). The expression of *fru<sup>M</sup>* in males and the  
212 absence of functional *fru<sup>F</sup>* transcripts in females help define male and female-specific neuronal  
213 pathways as well as the cell-specific expression patterns of genes regulated by Fru<sup>M</sup>. Promoter  
214 *fru P2* through *fru P6* produce common isoforms in both males and females that also affect sex-  
215 specific activity in courtship circuits of both sexes (Goodwin et al., 2000) (Figure 4A). In addition,  
216 special transcripts from *fru PD* and *fru P4* produce a less studied common transcript 3' exon  
217 (region 16, exon D) (Figure 4A) as well as a potential regulatory transcript lacking a DNA bind  
218 domain and large 3' UTR (region 18, exon C5 in *fru-RA* transcript) (Usui-Aoki et al., 2000)  
219 (Figure 4A). *Fru<sup>M</sup>* itself has multiple splicing isoforms that vary in the 3' end of the mRNA (*fru<sup>MA</sup>*,  
220 *fru<sup>MB</sup>*, *fru<sup>MC</sup>*), which encode proteins with variable zinc finger DNA binding domain of Fru<sup>M</sup>  
221 transcription factor (Goodwin et al., 2000; Nojima et al., 2014; Vernes, 2014). These regulate  
222 different aspects of the circuit controlling courtship behaviors, with Fru<sup>MC</sup> and Fru<sup>MB</sup> having the  
223 highest overlap behaviorally, and Fru<sup>MA</sup> having little to no effect on courtship (Neville et al.,  
224 2014).

225 We previously showed that social experience and signaling from Or47b and Or67d pheromone  
226 receptors alter open chromatin marks around *fru P1* promoter in the male antennae (Zhao et al.,  
227 2020). Interestingly, examination of total transcript levels for the entire *fru* gene locus showed  
228 little to no difference across experimental conditions (Figure 1D). These small changes in total  
229 transcript levels, despite dramatic changes in open chromatin marks in wild-type SH, and  
230 mutants in *Or47b*, *Or67d*, and *fru<sup>M</sup>*, prompted us to look at other aspects of gene regulation. It is  
231 known that changes in chromatin regulate many aspects of transcription such as transcriptional

232 initiation, elongation and alternative splicing (Adam and T., 2011; Naftelberg et al., 2015). The  
233 effects of chromatin on splicing are thought to occur especially because chromatin state alters  
234 the speed of RNA Polymerase II (RNAPII), which can lead to splicing mistakes like intron  
235 retention or exon skipping (Adam and T., 2011).

236 Given the functional differences in the *fru*<sup>M</sup> isoforms, we predicted that chromatin changes  
237 caused by social experience and pheromone receptor signaling could alter *fru* splicing. To  
238 explore this, we mapped reads from all experimental conditions to *fru* genomic locus and  
239 investigated exon levels using DEXseq (Anders et al., 2012). In general, transcript reads from  
240 *fru* locus appear noisier in experimental conditions compared to group-housed wild-type male  
241 antennae, with variations in the expression of coding and non-coding sequences (Figure 4B-E).  
242 In *Or47b* mutants, there is a small decrease in exon 1 (*fru* P1 promoter) and male-specific exon  
243 (exon 2) levels (Figure 4C; see methods – statistical analysis). *Or67d* mutants show a small  
244 decrease in exon 1 levels, but male-specific exon (exon 2) is unchanged (Figure 4D). The  
245 largest change in male-specific exon levels is seen in *fru*<sup>LexA</sup>/*fru*<sup>4-40</sup> allele (Figure 4B), which has  
246 a *LexA* transgene insertion disrupting the male-specific exon and a 70-Kb deletion from the *P1*  
247 promoter (Mellert et al., 2010). Exon 1 and the male-specific exon are unaltered in socially  
248 isolated antennae, yet there is a small increase in the female-specific exon (exon 3) (Figure 4E).  
249 In addition to the first 3 exons, a non-coding sequence (region 18) (Figure 4A), which is a part of  
250 *fru-RA* transcript (Usui-Aoki et al., 2000), significantly increases in *Or67d*, *Or47b*, and *fru*<sup>M</sup>  
251 mutants (Figure 4C,D). This transcript encodes a Fru protein that lacks these zinc finger  
252 domains but retains BTB/PDZ protein-protein interaction domain. Quantitative reverse  
253 transcription PCR (qRT-PCR) experiments confirmed this finding (Figure 4-figure supplement  
254 1). Increases in other untranslated regions (regions 20 and 22) are also observed in mutant  
255 samples. These results suggest social and pheromonal cues alter *fru* exon usage, likely  
256 indicating changes in *fru* splicing patterns.

257

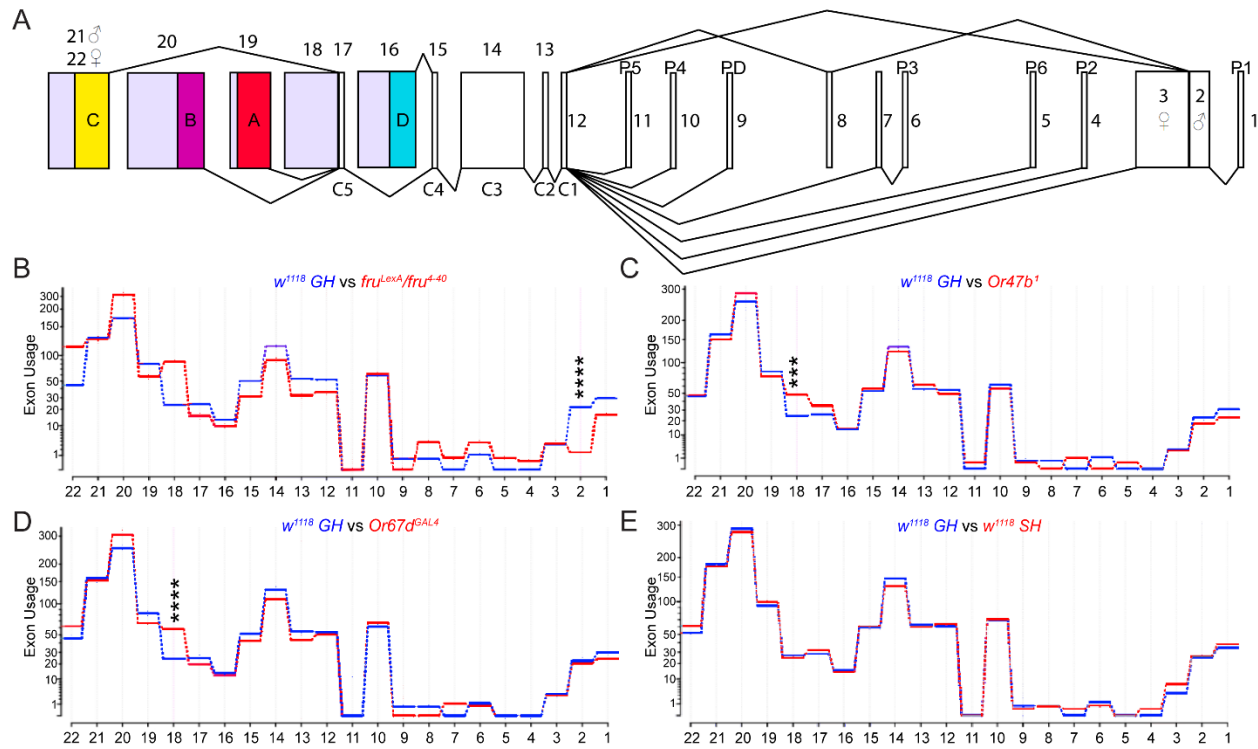

258

259 **Figure 4. Olfactory stimuli regulate exon usage across the whole *fru* genomic**

260 **locus.** Examination of the usage of various exons in Fruitless to determine distinct

261 changes in *fru*<sup>M</sup> transcripts using DEXSeq. **(A)** Schematic of Fruitless: 1-22 denote each

262 examined site. P1-P6 and PD denote promoters. C1-C5 denote common exons, while

263 A-D denote alternatively spliced 3' DNA binding encoding domains. **(B-E)** Exon-by-exon

264 comparison of *w*<sup>1118</sup> GH vs *w*<sup>1118</sup> SH **(B)**, *Or47b*<sup>1</sup> **(C)**, *Or67d*<sup>GAL4</sup> **(D)**, and *fru*<sup>LexA</sup>/*fru*<sup>4-40</sup>

265 **(E)**. Adjusted p-value was directly performed via DEXSeq (see methods – statistical

266 analysis). \*\*\*, p.adjust<0.001; \*\*\*\*, p.adjust<0.0001. Exon 2, *w*<sup>1118</sup> GH vs *fru*<sup>LexA</sup>/*fru*<sup>4-40</sup>,

267 p.adjust=1.25×10<sup>-10</sup>; Exon 18 (3'UTR), *w*<sup>1118</sup> GH vs *Or47b*<sup>1</sup>, p.adjust=8.17×10<sup>-4</sup>; Exon

268 18 (3'UTR), *w*<sup>1118</sup> GH vs *Or67d*<sup>GAL4</sup>, p.adjust=2.00×10<sup>-7</sup>.

269

270



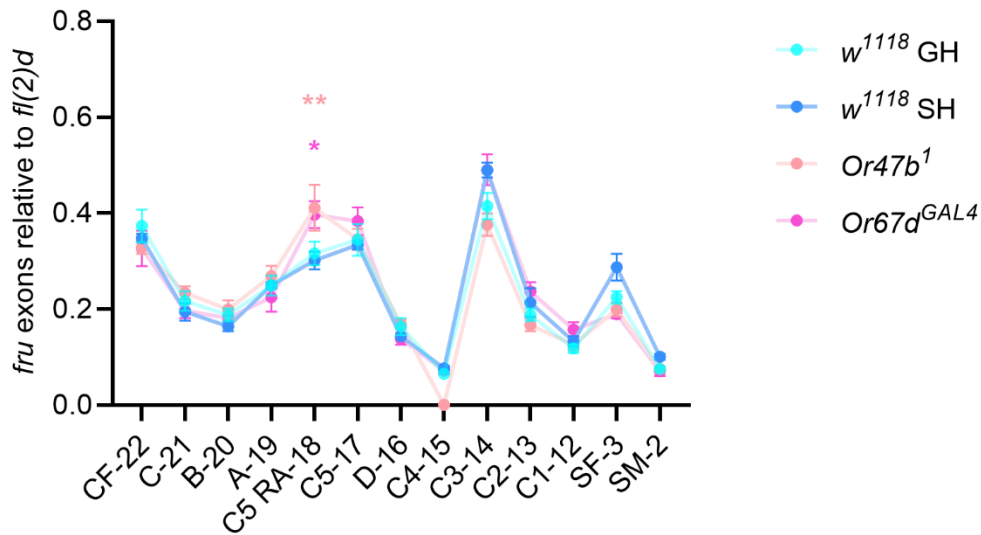

271

272 **Figure 4-figure supplement 1. Quantitative RT-PCR of *fru* exons from antennae of**

273 **group-housed and single-housed wild types, *Or47b* mutants, and *Or67d* mutants. For**

274 each genotype or condition, n = 4 biological replicates. Two-way ANOVA followed by multiple

275 comparisons within each exon (compare  $w^{1118}$  SH, *Or47b* mutants, and *Or67d* mutants to  $w^{1118}$

276 GH). \*, p<0.05; \*\*, p<0.01. C5 RA (exon 18): *Or47b*<sup>1</sup> vs  $w^{1118}$  GH (p=0.0023), *Or67d*<sup>GAL4</sup> vs  $w^{1118}$

277 GH (p= 0.0123).

278

279

280 **Bimodal regulation of genes modulating neurophysiology**  
281 **and neurotransmission by Fru<sup>M</sup> and pheromone receptor**  
282 **signaling**

283 Previous studies have shown that pheromone receptor signaling and social experience-  
284 dependent regulation of chromatin and RNAPII enrichment around *fru P1* promoter can  
285 ultimately scale and fine-tune behavioral responses to social environment (Sethi et al., 2019;  
286 Zhao et al., 2020). Additionally, previous reports on the genome-wide binding profiles for three  
287 Fru<sup>M</sup> isoforms in the central brain revealed isoform-specific differences in target genes that  
288 regulate neuronal development and function (Billeter et al., 2006; Neville et al., 2014). Fru<sup>M</sup>  
289 motifs are enriched among regulatory elements that are open in the female but closed in the  
290 male, suggesting Fru<sup>M</sup> functions as possible repressive transcription factor (Brovkina et al.,  
291 2021). Functional differences of Fru<sup>M</sup> isoforms also influence ORN responses to their  
292 pheromone ligands (Zhang et al., 2020). Thus, chromatin-based modulation of *fru* levels and  
293 splicing with social experience and pheromone signaling can provide a quick way to modulate  
294 neuronal physiology and synaptic communication by modifying gene expression programs. Yet,  
295 the effect of social experience and pheromone receptor signaling on gene expression programs  
296 or the mode of gene regulation by Fru<sup>M</sup> (as a transcriptional activator, repressor, or both)  
297 remains unknown.

298 As discussed previously, gene ontology analysis of these differentially expressed genes implies  
299 that many genes involved in neuromodulation are regulated by social context, pheromone  
300 receptor signaling, and Fru<sup>M</sup> function. To further investigate this, we specifically zoomed into  
301 genes associated with ion channel activity and/or neurotransmitter regulation (Figure 5A,B;  
302 Figure 6A,B). We clustered these genes based on their log<sub>2</sub> fold change in transcript levels  
303 compared to group-housed wild types in each experimental condition, while also showing their

304 corresponding expression levels in the antennae (RPKM, reads per kilobase of transcript, per  
305 million mapped reads) (Figure 5A,B; Figure 6A,B). We found many ion channel and/or  
306 neurotransmitter receptor-encoding genes showed up/down-regulation in response to social  
307 isolation, and loss of Or47b, Or67d, or Fru<sup>M</sup> function (Figure 5A,B; Figure 6A,B). Within ion  
308 channels, two subclasses stand out. These are the Degenerin/Epithelial Sodium Channel  
309 (DEG/ENaC) proteins known as pickpockets (ppks) and inward-rectifying potassium channels  
310 Irks. Additional genes also include those encoding calcium channels, for example, *Piezo*, *TrpA1*,  
311 and *cacophony* (*cac*) (Figure 5A,B).

312

### 313 *ppk gene family*

314 Recent reports pointed to the function of DEG/ENaC channels known as *pickpocket* family of  
315 sodium channels that act in Or47b and Or67d ORNs to regulate responses to their ligands  
316 (Zhang et al., 2020). Fru<sup>M</sup> binding motifs have been identified around many of these *ppk* family  
317 members, such as *ppk*, *ppk5*, *ppk6*, *ppk15*, *ppk19*, *ppk23*, *ppk25*, and *ppk30* (Dalton et al.,  
318 2013; Neville et al., 2014; Vernes, 2014). Both *ppk23* and *ppk25* have been identified as  
319 necessary for changes of physiology in Or47b ORNs through Fru<sup>MB</sup> and Fru<sup>MC</sup> activity,  
320 respectively, with Fru<sup>MB</sup> having an antagonistic effect on physiology in Or67d ORNs (Zhang et  
321 al., 2020). We therefore first examined the expression levels of *ppk* genes in the antennae. In  
322 group-housed wild-type antennae, *ppks* show varying degrees of and generally low expression,  
323 with *ppk5* displaying the highest levels (Figure 5C). Many *ppk* genes, including *ppk23*, seem not  
324 to be expressed in antenna. Analysis of recent single-cell RNA-seq data from ORNs (Li et al.,  
325 2020) revealing ORN class-specific expression of *ppks* also agree with this pattern, though a  
326 few *ppks* known to be expressed in several ORN classes are not detectable in this dataset,  
327 possibly due to the limitations of single-cell RNA-seq in detecting low-abundance genes (Figure  
328 5-figure supplement 1A). Even though there is no effect on the expression of any *ppk* family

329 members in socially isolated male antennae, many *ppk* genes are differentially regulated in *fru<sup>M</sup>*  
330 mutants, in agreement with the existing Fru<sup>M</sup> binding sites at their promoters. For example, *ppk6*  
331 and *ppk25* are upregulated in *fru<sup>M</sup>* mutants whereas *ppk5,7,13,14,15,19* are downregulated.  
332 Many of these genes also show correlated changes in *Or47b* and/or *Or67d* mutants  
333 (*ppk13,14,15,19,25*). *ppk6* is strikingly upregulated in both *fru<sup>M</sup>* and *Or67d* mutants, whereas  
334 *ppk7* is downregulated in both *Or47b* and *fru<sup>M</sup>* mutants (Figure 5C'). Of note is the significant  
335 changes in *ppk25* expression as *ppk25* has been found to change the sensitivity of Or47b  
336 neurons, is expressed in Or47b and Ir84 ORNs, but not Or67d ORNs, and has recently been  
337 shown to be downstream of Or47b and Ir84a activity (Ng et al., 2019; Pikielny, 2012) (Figure  
338 5C). The changes in *ppk25* levels were also validated through quantitative RT-PCR (Figure 5-  
339 figure supplement 1C-E). The bimodal changes in *ppk* transcripts in *fru<sup>M</sup>* mutants suggest Fru<sup>M</sup>  
340 can act as both a repressor and an activator of *ppk* gene regulation. Furthermore, given that  
341 pheromone receptor function regulates Fru, the patterns of *ppk* gene misregulation in *Or47b*  
342 and *Or67d* mutants are likely dependent on changes in Fru<sup>M</sup> activity downstream of pheromone  
343 receptor signaling.

344

#### 345 *Irk gene family*

346 *Irk* gene family encodes 3 inwardly rectifying potassium channels (*Irk1-3*) with binding motifs for  
347 Fru<sup>MA</sup> identified upstream of *Irk2* and binding of both Fru<sup>MA</sup> and Fru<sup>MC</sup> found around *Irk3* (Dalton  
348 et al., 2013; Neville et al., 2014; Vernes, 2014). Three *Irk* genes are expressed in varying levels  
349 in the antennae with *Irk1* having the lowest expression and *Irk2* having the highest expression  
350 (Figure 5D). We found that *Irk1* is upregulated in *Or47b* mutants, whereas *Irk2* shows the trend  
351 towards upregulation in response to social isolation (Figure 5D').

352 These results suggest that changes in the transcript levels of Fru<sup>M</sup> regulated sodium and  
353 potassium channels with social isolation and in pheromone receptor mutants may contribute to  
354 changes in neuronal responses and behaviors.

355

356

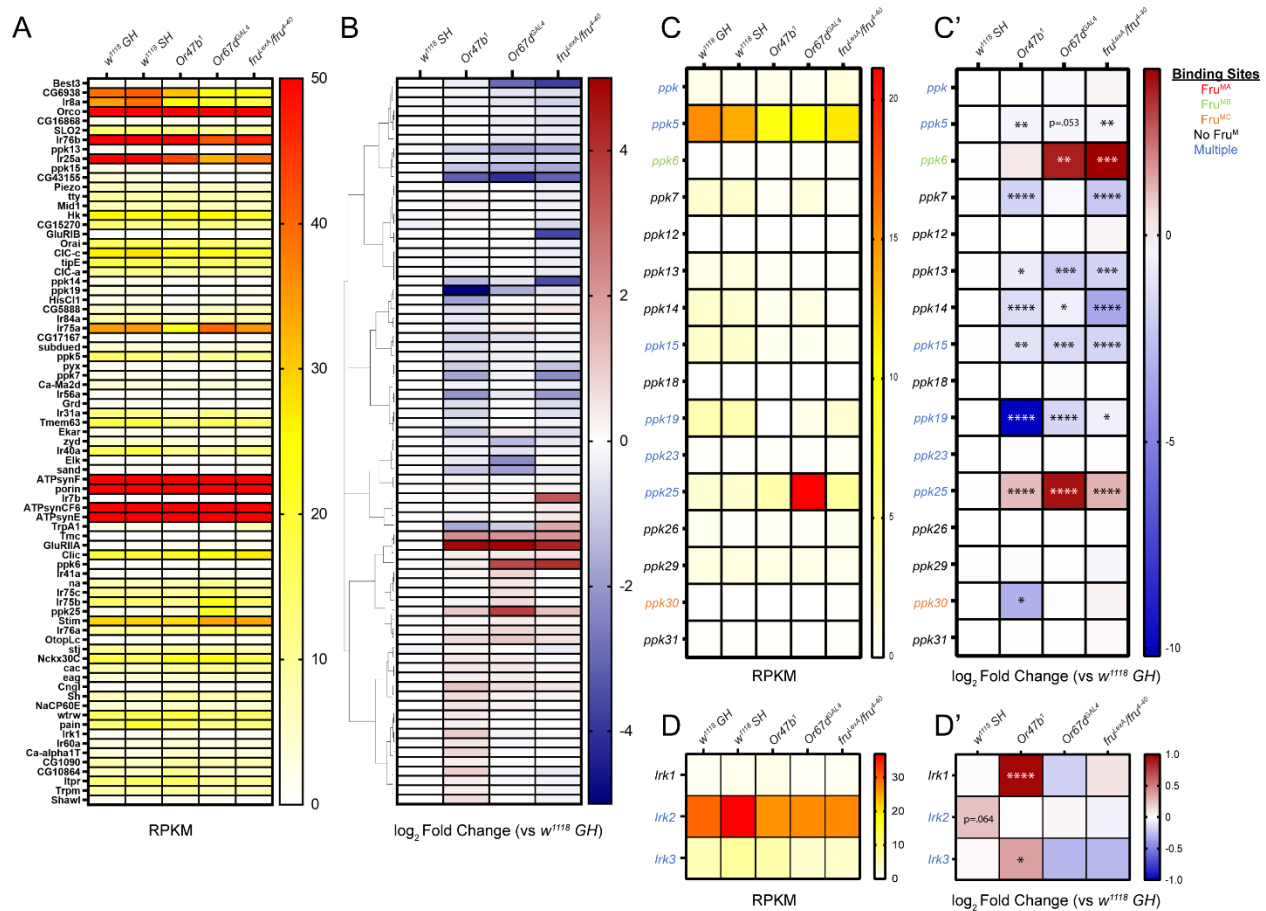

357

358 **Figure 5. Differentially expressed ion channel-encoding genes in response to**  
 359 **social isolation and loss of pheromone receptors or fru<sup>M</sup>. (A-B)** Examination of GO  
 360 term: 0005216 (ion channel activity) shows significant changes in various ion channel  
 361 subclasses. Hierarchically clustered heatmaps showing log<sub>2</sub> fold change compared to  
 362 group-housed wild-type antennae across all experimental conditions **(B)** and average  
 363 mRNA levels (RPKM) of replicates within each condition ordered in the same way as  
 364 log<sub>2</sub> fold change **(A)**. Genes that are not significant (adjusted p-value above 0.01) in any  
 365 experimental condition were filtered out. **(C-C')** RPKM **(C)** and log<sub>2</sub> fold change **(C')** for  
 366 *pickpocket* (*ppk*) gene family. **(D-D')** RPKM **(D)** and log<sub>2</sub> fold change **(D')** for *inwardly*  
 367 *rectifying potassium channel* (*Irk*) gene family. Adjusted p-value was directly performed

368 via DESeq2. \*, p.adjust<0.05; \*\*, p.adjust<0.01; \*\*\*, p.adjust<0.001; \*\*\*\*,

369 p.adjust<0.0001.

370

371

372

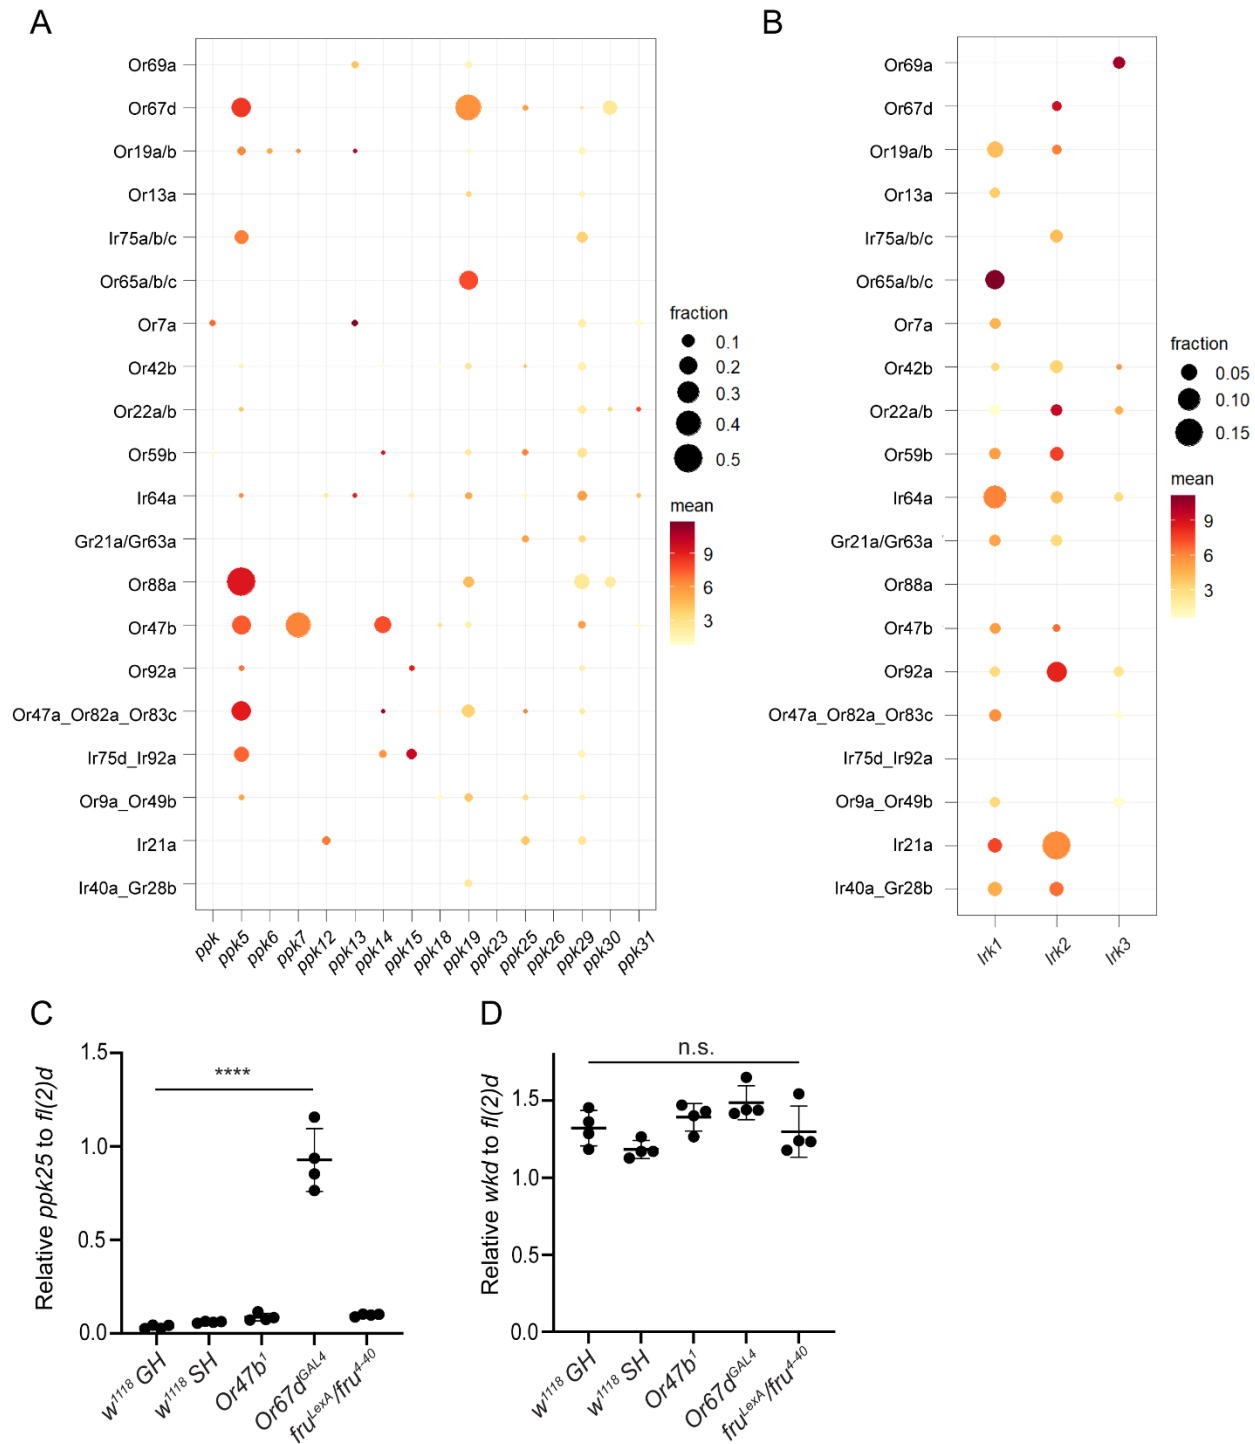

373

374 **Figure 5-figure supplement 1. Validation of *ppk* expression across ORN classes**

375 **and in mutants. (A-B) ORN class-specific expression of *ppk* and *Irk* family genes**

376 **based on single-cell RNA-seq datasets from the adult ORNs (McLaughlin et al., 2021).**



377 Size of each circle indicates the fraction of positive cells ( $\log_2(\text{CPM}+1) > 0.5$ ) and color  
378 intensity indicates the mean expression ( $\log_2(\text{CPM}+1)$ ) of all positive cells. **(C-D)**  
379 Quantitative RT-PCR validation of *ppk25* expression (C) and a negative control gene  
380 *wkd* expression (D) from antennae of grouped and socially isolated wild types, *Or47b*  
381 mutants, *Or67d* mutants, and *fru<sup>M</sup>* mutants normalized to *fl(2)d*. *fl(2)d* and *wkd* were  
382 selected based on their near-identical expression level across all conditions from the  
383 RNA-seq results and thus used as loading and negative control genes. For each  
384 genotype or condition, n=4 biological replicates. One-way ANOVA followed by multiple  
385 comparisons (compare other groups to group-housed wild types *w<sup>1118</sup> GH*). \*\*\*\*,  
386  $p < 0.0001$ .

387

388

389 Regulators of Neurotransmission

390 To ask if social experience, pheromone signaling, and Fru<sup>M</sup> function regulate genes involved in  
391 neurotransmission, we next examined the expression of neurotransmitter receptors,  
392 transporters, and synthesizers. ORNs in the antennae are mostly cholinergic (Wilson, 2013). In  
393 the antennal lobe it has been shown that lateral neurons, which include serotonergic,  
394 GABAergic, and glutamatergic interneurons, provide cross talk between antennal lobe neurons  
395 (Chou et al., 2010; Wilson, 2013). These neurons form connections on the presynaptic bouton  
396 of ORN synapses to cause lateral excitation or inhibition across glomeruli (Olsen et al., 2007;  
397 Wang et al., 2003; Wilson, 2013). These connections are required for fine tuning of signaling at  
398 synapses as a way of rapid modulation of neuronal function (Dacks et al., 2009; Johnson et al.,  
399 2009; Mohamed et al., 2019; Olsen et al., 2007; Sizemore and Dacks, 2016; Sudhakaran et al.,  
400 2012; Suzuki et al., 2020; Wang et al., 2003; Wong et al., 2002; Zhang et al., 2019). We found a  
401 high expression of choline acetyltransferase (*ChAT*) that catalyzes acetylcholine biosynthesis  
402 and *VACHT* that packages acetylcholine into synaptic vesicles, coinciding with their reported  
403 cholinergic roles. Moreover, we also found relatively high expression of several genes encoding  
404 receptors of various neurotransmitters, such as choline, serotonin (5-HT), GABA, and glutamate  
405 (Figure 6C-F'). Many of these genes, such as *nAChRalpha4/5*, *5-HT2A*, *5-HT7*, *GABA-B-R2*,  
406 and *GluRIIA*, have previously been found to regulate courtship behavior in flies through  
407 signaling in the antennal lobe (Becnel et al., 2011; Clowney et al., 2015; Johnson et al., 2011;  
408 Suzuki et al., 2020). Interestingly, *GABA-B-R2* was shown to be specifically involved in  
409 presynaptic gain control of Or47b ORNs (Root et al., 2008). Additionally, single-cell RNA-seq  
410 data shows both broadly expressed neurotransmitter genes like *GluRIIB* and *5-HT2B*, while  
411 others are specific to a subset of ORN classes (McLaughlin et al., 2021) (Figure 6-figure  
412 supplement 1). Overall, many of the genes encoding neurotransmitter receptors show  
413 expression changes in different experimental conditions (Figure 6B).

414 To zoom into genes related to specific neurotransmitters, we didn't observe any significant  
415 changes in response to social isolation, though a few genes, like *dmGlut*, appear to be  
416 upregulated compared to the grouping condition (Figure 6C,D'). We again found that loss of  
417 Fru<sup>M</sup> function led to bimodal effects on gene expression (Figure 6C-F'). Indeed, many of these  
418 genes have known Fru<sup>M</sup> binding to their promoters, including receptors *nAChRalpha1/3/4/5*,  
419 *GluRIIA*, *GluClalpha*, *5-HT1A*, *5-HT1B*, *5-HT2A*, *5-HT7*, and transporters/regulators such as  
420 *VAcHT*, *ChAT*, and *Gat* (Dalton et al., 2013; Neville et al., 2014; Vernes, 2014). Some of these  
421 genes display correlated changes between pheromone receptor mutants and *fru*<sup>M</sup> mutants, like  
422 *GluRIIA*, *dmGlut*, and *5-HT2A*, suggesting that the effects of pheromone signaling on  
423 neurotransmission can act via their influences on *fru* regulation (Figure 6D-E'). The changes in  
424 *5-HT2A* were also validated through qRT-PCR (Figure 6-figure supplement 2). Evident changes  
425 are also observed in some genes not known to be Fru<sup>M</sup> targets, for example, *GluRIB* which  
426 shows downregulation only in *fru*<sup>M</sup> mutants, and *5-HT2B* which shows upregulation in *Or47b*  
427 and *fru*<sup>M</sup> mutants (Figure 6D-E'). These may reflect effects of pheromone receptor signaling  
428 independent of Fru<sup>M</sup> function or indirect effects of Fru<sup>M</sup> activity. To summarize, the systems-level  
429 changes in expression of genes involved in neurotransmission and neurophysiology with social  
430 experience and pheromone receptor signaling can modulate ORN responses. In addition, these  
431 effects on gene expression with social signals can occur either in a Fru<sup>M</sup>-dependent manner or  
432 independently of Fru<sup>M</sup> in response to other gene regulatory pathways activated by pheromone  
433 receptor signaling.

434

435

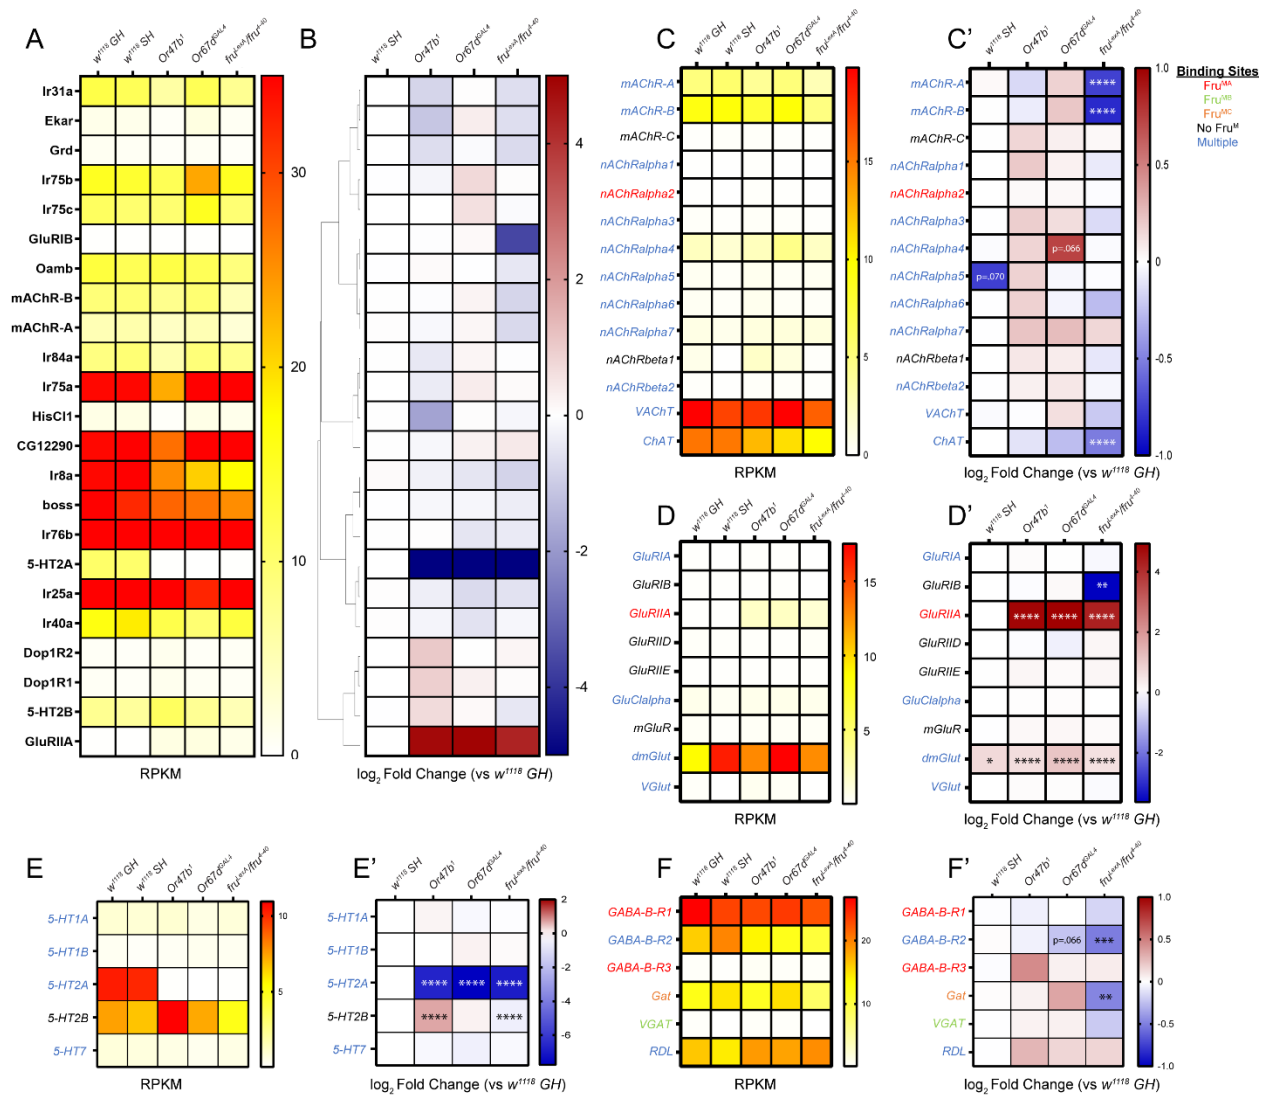

436

437 **Figure 6. Differentially expressed neurotransmitter receptor and transporter-**

438 **encoding genes in response to social isolation and loss of pheromone receptors**

439 **or fru<sup>M</sup>. (A-B)** Examination of GO term: 0030594 (neurotransmitter receptor activity)

440 shows significant changes in various neurotransmitter activity-associated subclasses.

441 Hierarchically clustered heatmaps showing log<sub>2</sub> fold change compared to group-housed

442 wild-type antennae across all experimental conditions **(B)** and average mRNA levels

443 (RPKM) of replicates within each condition ordered in the same way as log<sub>2</sub> fold change

444 **(A)**. Genes that are not significant (adjusted p-value above 0.01) in any experimental

445 condition were filtered out. **(C-C')** RPKM **(C)** and  $\log_2$  fold change **(C')** for acetylcholine-  
446 associated genes. **(D-D')** RPKM **(D)** and  $\log_2$  fold change **(D')** for glutamate-associated  
447 genes. **(E-E')** RPKM **(E)** and  $\log_2$  fold change **(E')** for serotonin-associated genes. **(F-F')**  
448 RPKM **(F)** and  $\log_2$  fold change **(F')** for GABA-associated genes. Adjusted p-value was  
449 directly performed via DESeq2. \*, p.adjust<0.05; \*\*, p.adjust<0.01; \*\*\*, p.adjust<0.001;  
450 \*\*\*\*, p.adjust<0.0001.

451

452

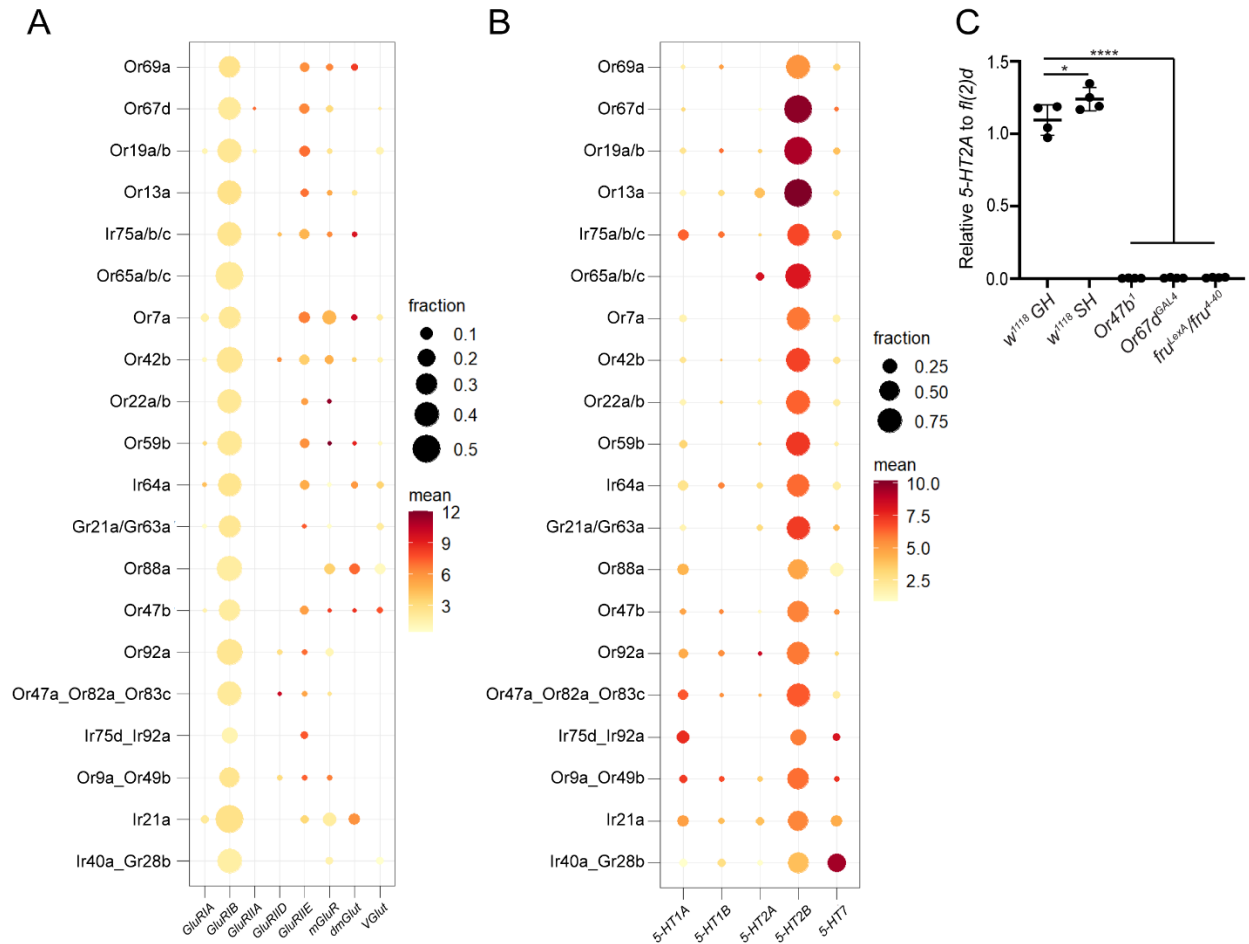

453

454 **Figure 6-figure supplement 1. Validation of neurotransmitter receptor expression**

455 **across ORN classes and in mutants. (A-B)** ORN class-specific expression of

456 serotonin and glutamate receptors based on single-cell RNA-seq datasets from the

457 adult ORNs (McLaughlin et al., 2021). The size of each circle indicates the fraction of

458 positive cells ( $\log_2(\text{CPM}+1) > 0.5$ ) and color intensity indicates the mean expression

459 ( $\log_2(\text{CPM}+1)$ ) of all positive cells. **(C)** Quantitative RT-PCR validation of 5-HT2A

460 expression. Relative expression of 5-HT2A from antennae of grouped and socially

461 isolated wild types, Or47b mutants, Or67d mutants, and fru<sup>M</sup> mutants normalized to

462 fl(2)d. For each genotype or condition, n=4 biological replicates. One-way ANOVA

463 followed by multiple comparisons (compare other groups to group-housed wild types

464  $w^{1118} GH$ ). \*,  $p < 0.05$ ; \*\*\*\*,  $p < 0.0001$ .

465

466

## 467 **Pheromone receptor signaling regulates genes involved in** 468 **hormone metabolism**

469 Previous studies have identified age-related cues such as juvenile hormone (JH) signaling  
470 together with social experience to control Or47b neuronal responses to pheromones and  
471 courtship behaviors in a Fru<sup>M</sup>-dependent manner (Lin et al., 2016; Sethi et al., 2019; Zhang and  
472 Su, 2020). JH signaling, concurrent with social experience, modifies chromatin around *fru P1*  
473 promoter and ultimately *fru*<sup>M</sup> levels in Or47b ORNs (Zhao et al., 2020). These studies also  
474 demonstrated that JH receptor enrichment at *fru P1* promoter increases in socially isolated flies  
475 as well as flies with disrupted Or47b signaling (Zhao et al., 2020). As mentioned above, gene  
476 ontology analysis in this study also brings genes involved in hormone metabolism (Figure 3).  
477 Thus, we specifically interrogated the genes regulating juvenile hormone levels in pheromone  
478 receptor and *fru*<sup>M</sup> mutants (Figure 7A-C').

479 Many of the enzymes involved in juvenile hormone biosynthesis and metabolism, such as  
480 juvenile hormone epoxide hydrolases (*Jheh1,2,3*), juvenile hormone esterase (*Jhe*), and  
481 juvenile hormone acid methyltransferase (*jhamt*), are expressed at varying levels in the  
482 antennae (Figure 7C; Figure 7-figure supplement 1). These genes are also reported to have  
483 Fru<sup>MA</sup> and Fru<sup>MC</sup> binding in their upstream regulatory elements (Dalton et al., 2013; Neville et  
484 al., 2014; Vernes, 2014). Two mostly enriched genes, *Jheh1* and *Jheh2*, show mild upregulation  
485 in *fru*<sup>M</sup> mutants but no significant changes in the absence of social cue or pheromone receptor  
486 signaling (Figure 7C,C'). On the other hand, both *Jhe* and *Jheh3* appear to be upregulated in  
487 social isolation while downregulated in *Or47b* mutants (Figure 7C'; Figure 7-figure supplement  
488 1). *Jhe* is of particular interest as Jhe activity is known to be necessary for robust male-specific  
489 courtship behaviors and mating success in addition to affecting the abundance of sex-specific  
490 pheromones such as 11-cis-vaccenyl acetate in males (Ellis and Carney, 2010; Liu et al., 2008).  
491 Furthermore, seminal work on *Jhe* and *Jheh3* has shown that these enzymes work together to



492 catabolize JH in *D. melanogaster* (Khlebodarova et al., 1996). These results suggest that social  
493 experience and pheromone receptor signaling regulates the expression of JH biosynthetic  
494 enzymes. Such changes can modulate juvenile hormone activity by rapidly catabolizing JH in  
495 the periphery and affecting downstream target genes, such as *fruitless*.

496

497

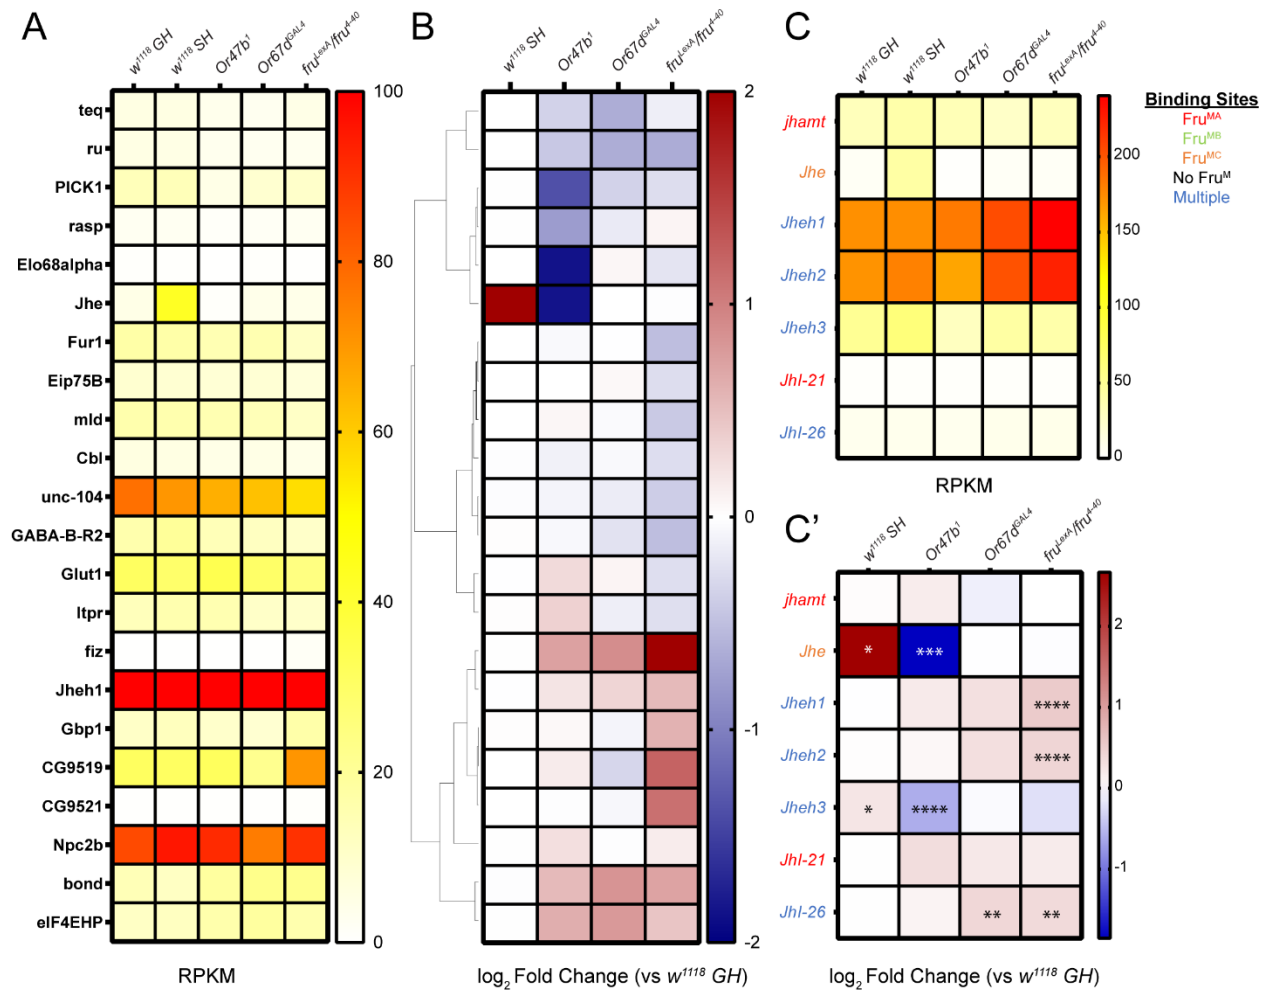

498

499 **Figure 7. Differentially expressed hormone regulator-encoding genes in response**

500 **to social isolation and loss of pheromone receptor or *fru<sup>M</sup>*. (A-B) Examination of**

501 **GO term: 0010817 (regulation of hormone levels) shows significant changes in various**

502 **hormone regulation-related gene subclasses. Hierarchically clustered heatmaps**

503 **showing log<sub>2</sub> fold change compared to group-housed wild-type antennae across all**

504 **experimental conditions (B) and average mRNA levels (RPKM) of replicates within each**

505 **condition ordered in the same way as log<sub>2</sub> fold change (A). Genes that are not**

506 **significant (adjusted p-value above 0.01) in any experimental condition were filtered out.**

507 **(C-C')** RPKM **(C)** and  $\log_2$  fold change **(C')** for juvenile hormone metabolism-related  
508 genes. Adjusted p-value was directly performed via DESeq2. \*, p.adjust<0.05; \*\*,  
509 p.adjust<0.01; \*\*\*, p.adjust<0.001; \*\*\*\*, p.adjust<0.0001.

510

511

A

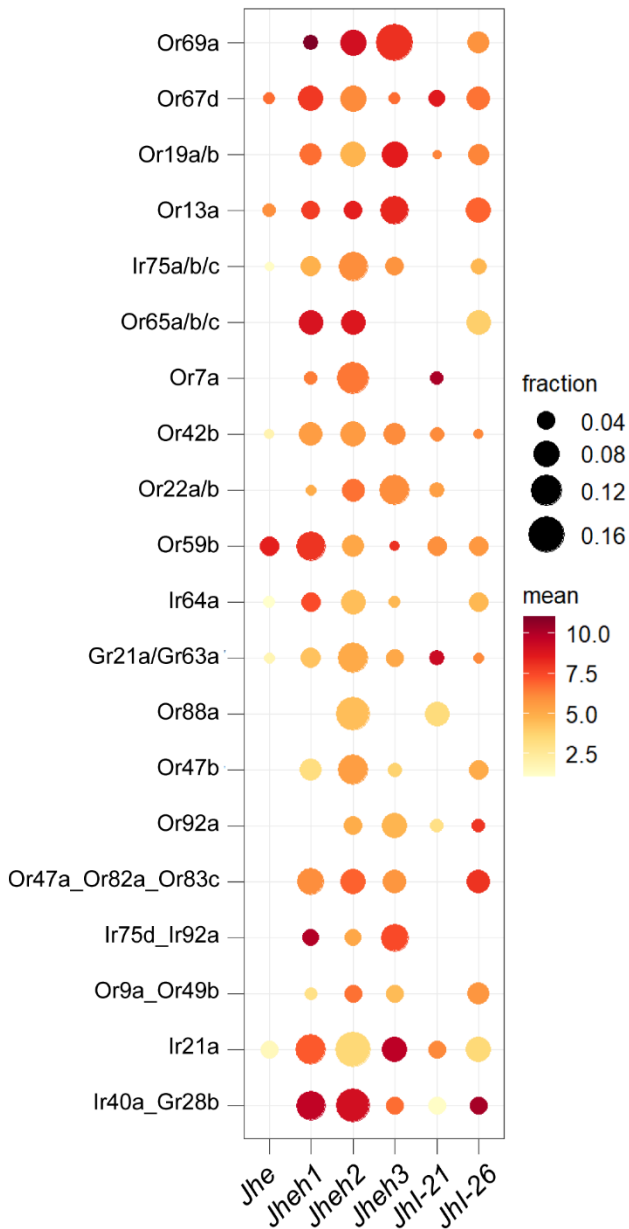

B

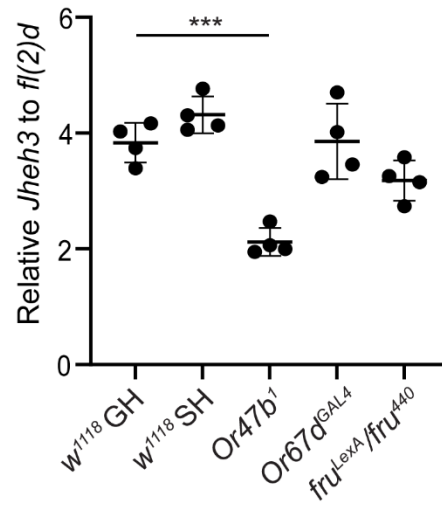

512

513 **Figure 7--figure supplement 1. Validation of hormone-related gene expression**  
 514 **across ORN classes and in mutants. (A-B)** ORN class-specific expression of juvenile  
 515 hormone regulators based on single-cell RNA-seq datasets from the adult ORNs  
 516 (McLaughlin et al., 2021). The size of each circle indicates the fraction of positive cells  
 517 ( $\log_2(\text{CPM}+1) > 0.5$ ) and color intensity indicates the mean expression ( $\log_2(\text{CPM}+1)$ ) of

518 all positive cells. **(C)** Quantitative RT-PCR validation of *Jheh3* expression. Relative  
519 expression of *Jheh3* from antennae of grouped and socially isolated wild types, *Or47b*  
520 mutants, *Or67d* mutants, and *fru<sup>M</sup>* mutants normalized to *fl(2)d*. For each genotype or  
521 condition, n=4 biological replicates. One-way ANOVA followed by multiple comparisons  
522 (compare other groups to group-housed wild types *w<sup>1118</sup> GH*). \*\*\*, p<0.001.

## 523 Discussion

524 Sensory experience influences many behaviors by modifying neural circuit function (Curley et  
525 al., 2011; Cushing and Kramer, 2005; Dey et al., 2015; Sethi et al., 2019). Yet, sensory  
526 experience-dependent molecular mechanisms that adjust circuit function and behaviors to the  
527 environment remain largely unknown. Here, we took advantage of the well-characterized and  
528 defined system of sex-specific behaviors, governed by the Fru<sup>M</sup>, which acts as a gene  
529 regulatory switch for male-specific circuit development, function, and behavior in *Drosophila*  
530 *melanogaster* (Dickson, 2008; Yamamoto, 2007; Yamamoto and Koganezawa, 2013;  
531 Yamamoto and Kohatsu, 2017). Our results show that social experience and pheromone  
532 signaling alters Fru<sup>M</sup> splicing patterns and neuromodulatory gene expression programs, which  
533 ultimately modulate circuit function and behavioral responses.

534 Previous studies demonstrated that social experience can modulate Fru<sup>M</sup>-dependent sex-  
535 specific behaviors such as courtship and aggression (Curley et al., 2011; Dey et al., 2015; Sethi  
536 et al., 2019). For example, social isolation decreases the sensitivity of Or47b neurons to their  
537 pheromone ligands in a Fru<sup>M</sup>-dependent manner, which leads to a decrease in male competitive  
538 courtship advantage (Sethi et al., 2019). Other studies have also shown that monosexual group  
539 housing can decrease the manifestation aspects of courtship behaviors such as courtship song  
540 and circling (Dankert et al., 2009). In addition to courtship, aggression behaviors which are  
541 under the control of Or67d and Or65a neurons and Fru<sup>M</sup> function, also change with social  
542 experience (Dankert et al., 2009; Liu et al., 2011). For example, social isolation significantly  
543 increases male-male aggression (Dankert et al., 2009; Wang et al., 2008). These reports  
544 highlight the importance of social experience and pheromone signaling in the execution of sex-  
545 specific behaviors.

546 What are the molecular mechanisms by which Fru<sup>M</sup> function is altered by social experience? We  
547 previously reported that social experience and Or47b signaling alters chromatin states around  
548 *fru* P1 promoter (Zhao et al., 2020). These chromatin changes around *fru* with pheromone  
549 signaling and social experience modifies the levels of *fru*<sup>M</sup> transcripts (Hueston et al., 2016;  
550 Sethi et al., 2019; Zhao et al., 2020). Nonetheless, the consequential details of chromatin-based  
551 changes on *fru* transcription remained unknown. One of our most intriguing findings from this  
552 transcriptome analysis is that these chromatin effects are associated with changes in the  
553 relative exon usage and splicing patterns of *fru* gene in response to impaired pheromone  
554 detection (Figure 4). Transcriptional regulation of *fru* is complex yielding 15 annotated  
555 alternatively spliced isoforms from 7 promoters giving rise to different 3' sequences which  
556 encode Zinc-finger DNA-binding domains of Fru protein (Lee et al., 2000; Meier et al., 2013;  
557 Nojima et al., 2014; Von Philipsborn et al., 2014). Alternative splicing generates Fru proteins  
558 with slightly different DNA-binding properties upstream of target genes which can have binding  
559 sites for single or multiple Fru<sup>M</sup> isoforms (Dalton et al., 2013; Neville et al., 2014; Vernes, 2014).  
560 Many of these genes encode regulators of neural development and function. Therefore,  
561 changes in *fru* splicing patterns can affect the expression of thousands of genes simultaneously,  
562 strongly modulating neuronal responses and circuit outputs in a short period of time.  
563 Remarkably, Fru<sup>M</sup> is expressed in ~2000 interconnected neurons highlighting a circuit for  
564 courtship behaviors from sensation to action with expression (Sato and Yamamoto, 2020;  
565 Yamamoto and Koganezawa, 2013). This expression pattern allows such neural activity-  
566 dependent influences on *fru* chromatin and transcription to propagate throughout the whole  
567 circuit. In summary, these features make circuit switch gene *fru*<sup>M</sup> an efficient molecular hub onto  
568 which many internal and external factors may act to modulate circuit activity and behavioral  
569 outputs by tweaking the levels of transcripts and splicing isoforms, leading to cascade changes  
570 in transcriptional programs.

571 Each pheromone sensing circuit relays different information about the social environment, which  
572 is integrated and processed to output a specific behavior. Likely due to differences in neuronal  
573 identity and function, different pheromone receptors have different effects on *fru* chromatin and  
574 splicing isoforms (Zhao et al., 2020)(Figure 4). Such sensory stimuli-dependent changes in Fru  
575 proteins can alter the expression of downstream neuromodulatory genes to have rapid,  
576 temporary, or lasting effects on neuronal activity and behavioral outputs. These changes are  
577 essential for organisms to form short/long-term adaptation to the environment. However, how  
578 these different cell types generate these differences in behavioral repertoire via changes in  
579 gene expression in the periphery have been largely unknown.

580 Many of the genes that show differential expression in response to social isolation and  
581 disruption of pheromone receptor or Fru<sup>M</sup> function encode neuromodulators that affect  
582 membrane potential, such as ion channels, transporters, and neurotransmitter receptors (Figure  
583 3; Figure 5; Figure 6). Among all conditions, social isolation possesses the fewest differentially  
584 expressed genes compared to group-housed controls with a small overlap with pheromone  
585 receptor and *fru*<sup>M</sup> mutants. This might be due to differences in gene expression changes in  
586 response to disruption of spontaneous activity of pheromone sensing olfactory neurons with  
587 socially isolation versus disruption of both spontaneous and evoked activity in pheromone  
588 receptor mutants. Loss of Fru<sup>M</sup> alters the expression of many neuromodulatory genes with  
589 known Fru<sup>M</sup> binding sites in a bimodal way, suggesting Fru<sup>M</sup> can act as both an activator and  
590 repressor of gene expression. Some of these differentially expressed genes are also altered in  
591 pheromone receptor mutants, generally in the same direction (Figure 2D,E). There are also  
592 unique overlaps between *Or47b* and *fru*<sup>M</sup> mutants, between *Or67d* and *fru*<sup>M</sup> mutants, and  
593 between *Or47b* and *Or67d* mutants (Figure 2B,E). Many of these differentially expressed genes  
594 are known to harbor binding sites for different Fru<sup>M</sup> isoforms. These suggest that some of the



595 differentially expressed genes in *Or47b* and *Or67d* mutant are due to Fru<sup>M</sup>-dependent changes,  
596 whereas others might be Fru<sup>M</sup>-independent, caused by OR signaling and/or ORN activity.

597 One functionally relevant gene among the genes that show differential regulation in pheromone  
598 receptor and *fru*<sup>M</sup> mutants is the Fru<sup>M</sup> target gene *ppk25*, which previously was shown to  
599 modulate ORN responses in *Or47b* and *Or67d* neurons (Ng et al., 2019; Zhang et al.,  
600 2020). *ppk25* belongs to a family of sodium channels that serve a variety of functions, from  
601 neuromodulation to detection of sensory cues. PPK protein complexes, generally are composed  
602 of multiple subunits encoded by different *ppk* genes. Many *ppk* genes contain binding sites for  
603 Fru<sup>M</sup> isoforms in their promoter regions (Dalton et al., 2013; Neville et al., 2014; Vernes, 2014).  
604 In addition, a recent study implicated isoform-specific Fru<sup>M</sup>-dependent regulation of *ppk25* and  
605 *ppk23* in the modulation of *Or47b* and *Or67d* responses (Ng et al., 2019; Zhang et al., 2020).  
606 According to the genetic analysis in this study, Fru<sup>MB</sup> and Fru<sup>MC</sup> positively regulate the  
607 expression of *ppk25* and *ppk23*, respectively. There are apparent discrepancies with this  
608 interpretation and transcriptome data from our study, as well as others (Li et al., 2020;  
609 McLaughlin et al., 2021). While our transcriptome analysis agrees with a regulatory role for Fru<sup>M</sup>  
610 in *ppk25* gene regulation, the regulatory mode is repressive; that is, *ppk25* expression is  
611 upregulated in *Or47b*, *Or67d*, and *fru* mutants. This type of repressive role for Fru<sup>M</sup> in  
612 transcription also is in consensus with previous studies demonstrating Fru<sup>M</sup> interactions with  
613 transcriptionally repressive histone-modifying enzymes such as HDAC1 (Ito et al., 2013, 2012).  
614 In addition, we are not able to detect any transcripts for *ppk23* in the antennae, and the  
615 expression of *ppk23* does not change in *Or47b*, *Or67d*, and *fru*<sup>M</sup> mutants. Instead, we noticed  
616 other *ppk* genes such as *ppk6,7,13,14,15,19* are altered in different mutant conditions. Fru<sup>M</sup>  
617 seems to have a bidirectional role in regulating *ppk* gene expression, where it activates the  
618 expression of a subset of *ppk* genes (*ppk7,13,14,15*) while repressing the expression of others  
619 (*ppk6* and *ppk25*). One way to reconcile these differences is that multiprotein PPK complexes

620 composed of combinations of different PPK subunits, and the stoichiometric levels of each *ppk*  
621 transcript in a given neuron can determine channel function. For example, misexpression of  
622 *ppk23*, which normally is not expressed in the antennal ORNs, can interfere with PPK channel  
623 function by disrupting the existing functional complexes in a given neuron or forming new PPK  
624 complexes, thus affecting physiological properties. Another possibility is that the slight  
625 upregulation of *ppk25* in *Or47b* and *fru<sup>M</sup>* mutants as well as large changes in *Or67d* mutants  
626 may be due to global *fru<sup>M</sup>* changes in the whole antennae, or through retrograde  
627 neuromodulatory signaling from the antennal lobe.

628 Antennal sensilla contain cell types other than ORNs, such as glia-like cells and support cells of  
629 sensillum, as well as epithelial cells. Since our transcription data is from the whole antennae,  
630 one possibility we cannot exclude is that differences in antennal gene expression in different  
631 genetic and social conditions are readouts from non-neuronal cells. Even though we anticipate  
632 the immediate effects of *Or67d* and *Or47b* mutants to happen in the ORNs expressing these  
633 two receptors, signals from ORNs can lead to secondary changes in gene expression in non-  
634 neuronal cells within the sensillum. This also brings to light a general issue with bulk tissue and  
635 whole gene knockouts where large cell-type-specific changes may be masked by cell-  
636 nonautonomous changes in gene expression from others cell types, as well as retrograde  
637 feedback signaling within olfactory circuits. Regardless, our data shows many of the  
638 differentially expressed genes encode regulators of neuronal function and neuromodulation.  
639 This increases the likelihood that the transcriptional changes in response to social and  
640 pheromonal cues are happening mostly in the neurons that respond to social cues, such as  
641 *Or47b* and *Or67d* ORNs. Future single-cell chromatin and transcription profiles from *Fru<sup>M</sup>*-  
642 positive neurons in the antenna and brain will provide deeper insights to neuron-specific  
643 changes in gene regulation from the peripheral to the central nervous system that modulate  
644 circuit function in response to social cues.

## 645 **Material and Methods**

### 646 **Fly genetics and genotypes**

647 Flies were raised on standard fly food (containing yeast, cornmeal, agar, and molasses) at 25°C  
648 in a 12-hour light/12-hour dark cycle in cylindrical plastic vials (diameter, 24 mm and height, 94  
649 mm). For social isolation (single housing, SH) condition, 80-100 hour-old pupae were separated  
650 by sex and males were placed into individual vials, allowed to eclose alone, and aged to 7 days  
651 to deprive flies of pheromone interaction on ORNs. For group housing (GH) condition, 25-30  
652 newly eclosed males were collected and placed into food vials. These were aged to 7 days and  
653 180 antennae were dissected per sample, for a total of 3 samples for  $w^{1118}$  GH, 3 samples for  
654  $w^{1118}$  SH, 3 samples for  $Or47b^1$  mutants ( $Or47b^1/Or47b^1$ ;  $Or47b-GAL4$ ,  $UAS-mCD8GFP/Or47b-$   
655  $GAL4$ ,  $UAS-mCD8GFP$ ), 3 samples for  $Or67d^{GAL4}$  mutants ( $UAS-mCD8GFP/UAS-mCD8GFP$ ;  
656  $Or67d^{GAL4}/Or67d^{GAL4}$ ), and 2 samples for  $fru^{LexA}/fru^{4-40}$  mutants ( $w^+; +/+; fru^{LexA}/fru^{4-40}$ ). All fly  
657 strains  $w^{1118}$ ,  $Or67d^{Gal4}$ ,  $Or47b^1$ ,  $fru^{LexA}/fru^{4-40}$ , were maintained at room temperature.

### 658 **RNA-seq**

659 RNA-seq was performed as described before (Li et al., 2016). Male flies are aged for 7 days  
660 and dissected for the third antennal segment (~180 antennae per genotype). RNA was  
661 extracted from dissected tissues samples using Qiagen RNA-easy extraction kit, quantified  
662 using a Qubit RNA assay kit and checked for quality using a High Sensitivity RNA ScreenTape  
663 on a TapesStation (Agilent). RNA integrity scores are typically 7.0 and greater. 1ug of RNA was  
664 used to construct libraries for sequencing using a KAPA mRNA library prep kit with polyA RNA  
665 selection. Barcoded libraries are sequenced on a Novaseq 6000 SP 50 bp following  
666 manufacturer's instructions (Illumina). After demultiplexing sequence quality was assessed  
667 using FASTQC (Version 0.11.9). While there are issues with under-clustering of the samples

668 and unbalanced pools, the data quality was typical for RNA extracted from fresh frozen material.

669 The unbalanced pools resulted in differences in sequencing depth of each sample.

## 670 Analysis of RNA-seq data

671 Once sequenced, the reads are preprocessed with FASTP (S. Chen et al. 2018) to remove

672 adaptors and trim/filter for quality. These are mapped to the dm6 reference genome using

673 MapSplice2 (Wang et al. 2010), with individual mapping rates exceeding 98% in all cases. This

674 raw alignment was deduplicated and filtered for mapping quality and correct pairing; additional

675 alignments are generated to confirm results are robust to mapping ambiguity. Mapped reads are

676 assigned to genes in the annotation using the feature Counts command from the SubRead

677 package (Liao, Smyth, and Shi 2014). Differential expression was modeled using DESeq2

678 (Love, Huber, and Anders 2014) using the “apeglm” shrinkage estimator, and data was

679 processed and visualized in R using the tidyverse framework (Wickham et al 2019),

680 supplemented with the biomaRt (Durinck et al 2009), ComplexHeatmap (Gu, Eils, & Schlesner,

681 2016) and UpSet (N. Gehlenborg 2019) packages. The bioinformatics pipeline was

682 implemented in Snakemake (Köster, J., & Rahmann, S. 2012). Code for the analysis is

683 deposited on GitHub

684 ([https://github.com/csoeder/VolkanLab\\_BehaviorGenetics/tree/master/scripts](https://github.com/csoeder/VolkanLab_BehaviorGenetics/tree/master/scripts)).

685 DEXSeq was used to test for differential exon use under models corresponding to those used in

686 differential gene expression (Anders et al., 2012). From the genome-wide test, the *fruitless*

687 locus was examined in particular. Further post-hoc t-tests are processed on non-normalized

688 data of individual read count comparisons to look for differences at individual exons.

## 689 Statistical analysis

690 Adjusted p-value were directly calculated from DESeq2 or DEXSeq. Other statistical analysis is  
691 described in the legend of corresponding figures.

692 Specifically, to compare the exon usage in Figure 4, we also calculated p-value from t-tests of  
693 independent comparisons of group housed male antennae transcriptome to each experimental  
694 condition at an individual exon segment (1-22, see the table below). Even though many exons  
695 level differences were significant using this method, adjusted p-value from DEXSeq gave rise to  
696 fewer significantly altered exon levels.

697

| t-test p-value    | $w^{1118}$ GH vs                |                           |                              |                                                         |
|-------------------|---------------------------------|---------------------------|------------------------------|---------------------------------------------------------|
| Exon              | $w^{1118}$ SH                   | <i>Or47b</i> <sup>1</sup> | <i>Or67d</i> <sup>GAL4</sup> | <i>fru</i> <sup>LexA</sup> / <i>fru</i> <sup>4-40</sup> |
| P1 (1)            | 0.5696                          | 0.0316                    | 0.0619                       | 0.0764                                                  |
| Male (2)          | 0.6843                          | 0.0292                    | 0.0125                       | 0.0013                                                  |
| Female (3)        | 0.0697                          | 0.3486                    | 0.6932                       | 0.5993                                                  |
| P2 (4)            | Expression too low to calculate |                           |                              |                                                         |
| P6 (5)            | Expression too low to calculate |                           |                              |                                                         |
| P3 (6)            | Expression too low to calculate |                           |                              |                                                         |
| Exon 7 (7)        | Expression too low to calculate |                           |                              |                                                         |
| Exon 8 (8)        | Expression too low to calculate |                           |                              |                                                         |
| PD (9)            | Expression too low to calculate |                           |                              |                                                         |
| P4 (10)           | 0.8788                          | 0.0387                    | 0.3002                       | 0.1493                                                  |
| P5 (11)           | Expression too low to calculate |                           |                              |                                                         |
| C1 (12)           | 0.5489                          | 0.0117                    | 0.1050                       | 0.0498                                                  |
| C2 (13)           | 0.6455                          | 0.0826                    | 0.0007                       | 0.0079                                                  |
| C3 (14)           | 0.3622                          | 0.1247                    | 0.0399                       | 0.0650                                                  |
| C4 (15)           | 0.8295                          | 0.3811                    | 0.0704                       | 0.1205                                                  |
| D (16)            | 0.7090                          | 0.2796                    | 0.2787                       | 0.7042                                                  |
| C5 (17)           | 0.7575                          | 0.7338                    | 0.2378                       | 0.3174                                                  |
| 3'UTR (18)        | 0.7235                          | 0.0086                    | 0.0754                       | 0.1328                                                  |
| FruA (19)         | 0.5241                          | 0.0498                    | 0.0171                       | 0.0878                                                  |
| FruB (20)         | 0.8142                          | 0.4809                    | 0.7873                       | 0.2550                                                  |
| FruMC male (21)   | 0.8519                          | 0.1819                    | 0.1969                       | 0.1943                                                  |
| FruFC female (22) | 0.4168                          | 0.1123                    | 0.8214                       | 0.0223                                                  |

## 699 Quantitative reverse transcription PCR (qRT-PCR)

700 The qRT-PCR protocol was modified based on the previous protocol of the Volkan lab (Li et al.,  
701 2016). For each genotype, four biological replicates were prepared separately, with each  
702 replicate containing 100 antennae from 50 males (7d old). Total antennae RNA was extracted  
703 using the RNeasy Mini Kit (QIAGEN, 74104) and treated with DNase I (TURBO DNA-free Kit,  
704 Invitrogen, Thermo Fisher Scientific AM1907) to remove genome DNA. cDNA was generated  
705 from the reverse transcription of 80-150ng total RNA using the SuperScript IV First-Strand  
706 Synthesis Kit (Invitrogen, 18091050) and poly d(T) as transcription primers. qPCR was  
707 performed using the FastStart Essential DNA Green Master kit (Roche, 06924204001) on  
708 LightCycler® 96 instrument (Roche, 05815916001). The primers are listed in table 1. The  
709 expression level was calculated by  $\Delta$ Ct method using the fl(2)d as the standard gene. The  
710 calculation was performed in GraphPad Prism software.

711

712 Primers Sets used in qRT-PCR assays:

| Primer Names                   | Sequences                |
|--------------------------------|--------------------------|
| (F: Forward; R: Reverse)       |                          |
| fl(2)d set15 F (exon spanning) | AGAAATCGCAGTCGGAGTT      |
| fl(2)d set15 R                 | CCTTCTCAAGCGTTTGTATGC    |
| wkd set34 F                    | AATGTGCTAAAGGCCTACTC     |
| wkd set34 R (exon spanning)    | TGCAGGTATACATCGCACA      |
| ppk25 set11 F (exon spanning)  | CTGCAGTATTACAGTCCCTACC   |
| ppk25 set11 R                  | TCCGGATACTGTGCAGATTG     |
| 5-HT2A set15 F (exon spanning) | CCGTTCTTGGTCTGGTCAAT     |
| 5-HT2A set15 R                 | CGTCAATGCGTATGTGGTAAC    |
| Jheh3 set10 F (exon spanning)  | GACCGAAATTCAGGGCTTG      |
| Jheh3 set10 R                  | GGTTAGCATGGGTATAAAGTCG   |
| fru SM set7 F                  | ATGGGCACCTGCACAGC        |
| fru SM set7 R                  | TGCCCGCACATCCGTTT        |
| fru SF set1 F                  | TGAGAATTCGAGGACGTGTG     |
| fru SF set1 R                  | GTTCCGGTTGAGTGTTGATTG    |
| fru C1 set1 F                  | AGGAGCGATGGACCAGCAATTC   |
| fru C1 set1 R                  | TTGACTGTTTCGCCCTCGCA     |
| fru C2 set2 F                  | ACAGAACCAGCATCCACATCC    |
| fru C2 set2 R                  | CTCGGCCGTCTTGAGAAACAT    |
| fru C3 set2 F                  | GCAGCTGGATTATAGCAACAAGGA |
| fru C3 set2 R                  | CTCCCTATTGCTGCTGCTGTT    |
| fru C4 set1 F                  | TGACCACAAGCGTTCATCT      |



|                   |                       |
|-------------------|-----------------------|
| fru C4 set1 R     | CCATCAGCTCCTGCTTGA    |
| fru exonD set7 F  | CGTCAACCACCACAACAA    |
| fru exonD set7 R  | CTTGCCCACATTTATGGTGA  |
| fru C5 set2_2 F   | ACGCGGAGGATATGTCAA    |
| fru C5 set2_2 R   | GTCCAGCTGCAGTTGTTT    |
| fru C5RA set2_1 F | CACACACACACACTCAAATAC |
| fru C5RA set2_1 R | GTTCAACGGATTCTTCACATC |
| fru exonA set6 F  | TGGCACCATGCCAATATC    |
| fru exonA set6 R  | TCCGCATGCTTGATCTTAC   |
| fru exonB set2 F  | CACATCCGCAACCACTAC    |
| fru exonB set2 R  | GTACATGGGATGCTTGAAC   |
| fru exonC set4 F  | CGCTTGGTTATGGCAATC    |
| fru exonC set4 R  | GGTACGACATGGTGTGAT    |
| fru exonCF set1 F | ACCAAGCAGTCAGAAACC    |
| fru exonCF set1 R | GCCGATTACAAGTGGATGTA  |

713

714

715

716

## 717 Acknowledgement

718 We are grateful to Liqun Luo and Hongjie Li for for sharing the single cell RNA-seq data from  
719 developing ORNs prior to publication. We would like to thank Yetong Huang, George Thomas  
720 Barlow, and Paulina Guerra-Schleske for their contributions to sample collection and RNA  
721 extraction of samples, and the Volkan lab for help with the manuscript. We thank the  
722 Bloomington Stock Center and UNC High Throughput Sequencing Facility for their services.

723

## 724 Funding statement

725 This study was supported by National Institute of Health grant number R01NS109401 and  
726 National Science Foundation award number 2006471 to PCV. Funders had no decisions in the  
727 design of the study, collection of the data or analysis, where the publication is submitted or any  
728 hand in writing the manuscript. No conflicts of interest are found.

729

## 730 Data availability

731 All relevant data are within the paper and its Supporting information files. Raw Data will be  
732 uploaded to the GEO under embargo pending the submission and acceptance of the data  
733 submitted here for publication.

734

735

736

## 737 **References**

- 738 Adam J, T. P. 2011. The Worlds of Splicing and Chromatin Collide RNA Processing. InTech.  
739 doi:10.5772/19985
- 740 Anders S, Reyes A, Huber W. 2012. Detecting differential usage of exons from RNA-seq data.  
741 *Genome Res* **22**. doi:10.1101/gr.133744.111
- 742 Becnel J, Johnson O, Luo J, Nässel DR, Nichols CD. 2011. The serotonin 5-HT7 receptor is  
743 expressed in the brain of drosophila, and is essential for normal courtship and mating.  
744 *PLoS One*. doi:10.1371/journal.pone.0020800
- 745 Billeter JC, Vilella A, Allendorfer JB, Dornan AJ, Richardson M, Gailey DA, Goodwin SF. 2006.  
746 Isoform-specific control of male neuronal differentiation and behavior in *Drosophila* by the  
747 fruitless gene. *Curr Biol* **16**:1063–1076. doi:S0960-9822(06)01500-4  
748 [pii]10.1016/j.cub.2006.04.039
- 749 Brovkina M V., Duffié R, Burtis AEC, Clowney EJ. 2021. Fruitless decommissions regulatory  
750 elements to implement cell-type-specific neuronal masculinization. *PLoS Genet* **17**.  
751 doi:10.1371/JOURNAL.PGEN.1009338
- 752 Carrillo RA, Ozkan E, Menon KP, Nagarkar-Jaiswal S, Lee PT, Jeon M, Birnbaum ME, Bellen  
753 HJ, Garcia KC, Zinn K. 2015. Control of Synaptic Connectivity by a Network of *Drosophila*  
754 IgSF Cell Surface Proteins. *Cell* **163**:1770–1782. doi:10.1016/j.cell.2015.11.022
- 755 Chou YH, Spletter ML, Yaksi E, Leong JCS, Wilson RI, Luo L. 2010. Diversity and wiring  
756 variability of olfactory local interneurons in the *Drosophila* antennal lobe. *Nat Neurosci* **13**.  
757 doi:10.1038/nn.2489
- 758 Clowney EJ, Iguchi S, Bussell JJ, Scheer E, Ruta V. 2015. Multimodal Chemosensory Circuits  
759 Controlling Male Courtship in *Drosophila*. *Neuron*. doi:10.1016/j.neuron.2015.07.025

- 760 Curley JP, Jensen CL, Mashoodh R, Champagne FA. 2011. Social influences on neurobiology  
761 and behavior: Epigenetic effects during development. *Psychoneuroendocrinology*.  
762 doi:10.1016/j.psyneuen.2010.06.005
- 763 Cushing BS, Kramer KM. 2005. Mechanisms underlying epigenetic effects of early social  
764 experience: The role of neuropeptides and steroids. *Neurosci Biobehav Rev*.  
765 doi:10.1016/j.neubiorev.2005.04.001
- 766 Dacks AM, Green DS, Root CM, Nighorn AJ, Wang JW. 2009. Serotonin modulates olfactory  
767 processing in the antennal lobe of drosophila. *J Neurogenet* **23**:366–377.  
768 doi:10.3109/01677060903085722
- 769 Dalton JE, Fear JM, Knott S, Baker BS, McIntyre LM, Arbeitman MN. 2013. Male-specific  
770 Fruitless isoforms have different regulatory roles conferred by distinct zinc finger DNA  
771 binding domains. *BMC Genomics*. doi:10.1186/1471-2164-14-659
- 772 Dankert H, Wang L, Hoopfer ED, Anderson DJ, Perona P. 2009. Automated monitoring and  
773 analysis of social behavior in Drosophila. *Nat Methods*. doi:10.1038/nmeth.1310
- 774 Demir E, Dickson BJ. 2005. fruitless splicing specifies male courtship behavior in Drosophila.  
775 *Cell* **121**:785–794. doi:S0092-8674(05)00407-1 [pii]10.1016/j.cell.2005.04.027
- 776 Dey S, Chamero P, Peluso JJ, Stowers L, Dey S, Chamero P, Pru JK, Chien M, Ibarra-soria X,  
777 Spencer KR, Logan DW, Matsunami H, Peluso JJ, Stowers L. 2015. Cyclic Regulation of  
778 Sensory Perception by a Female Hormone Alters Behavior. *Cell*.  
779 doi:10.1016/j.cell.2015.04.052
- 780 Dickson BJ. 2008. Wired for sex: the neurobiology of Drosophila mating decisions. *Science (80-*  
781 *)* **322**:904–909. doi:322/5903/904 [pii]10.1126/science.1159276
- 782 Dweck HK, Ebrahim SA, Thoma M, Mohamed AA, Keesey IW, Trona F, Lavista-Llanos S,

- 783 Svatos A, Sachse S, Knaden M, Hansson BS. 2015. Pheromones mediating copulation  
784 and attraction in *Drosophila*. *Proc Natl Acad Sci U S A* **112**:E2829-35.  
785 doi:10.1073/pnas.1504527112
- 786 Eden E, Lipson D, Yogev S, Yakhini Z. 2007. Discovering motifs in ranked lists of DNA  
787 sequences. *PLoS Comput Biol*. doi:10.1371/journal.pcbi.0030039
- 788 Eden E, Navon R, Steinfeld I, Lipson D, Yakhini Z. 2009. GOrilla: A tool for discovery and  
789 visualization of enriched GO terms in ranked gene lists. *BMC Bioinformatics*.  
790 doi:10.1186/1471-2105-10-48
- 791 Ellis LL, Carney GE. 2010. Mating alters gene expression patterns in *Drosophila melanogaster*  
792 male heads. *BMC Genomics*. doi:10.1186/1471-2164-11-558
- 793 Flavell SW, Greenberg ME. 2008. Signaling mechanisms linking neuronal activity to gene  
794 expression and plasticity of the nervous system. *Annu Rev Neurosci*.  
795 doi:10.1146/annurev.neuro.31.060407.125631
- 796 Goodwin SF, Taylor BJ, Vellella A, Foss M, Ryner LC, Baker BS, Hall JC. 2000. Aberrant  
797 splicing and altered spatial expression patterns in fruitless mutants of *Drosophila*  
798 *melanogaster*. *Genetics* **154**:725–745.
- 799 Goulding SE, zur Lage P, Jarman AP. 2000. amos, a proneural gene for *Drosophila* olfactory  
800 sense organs that is regulated by lozenge. *Neuron* **25**:69–78.
- 801 Hueston CE, Olsen D, Li Q, Okuwa S, Peng B, Wu J, Volkan PC. 2016. Chromatin Modulatory  
802 Proteins and Olfactory Receptor Signaling in the Refinement and Maintenance of Fruitless  
803 Expression in Olfactory Receptor Neurons. *PLoS Biol* **14**.  
804 doi:10.1371/journal.pbio.1002443
- 805 Ito H, Sato K, Koganezawa M, Ote M, Matsumoto K, Hama C, Yamamoto D. 2012. Fruitless

- 806 recruits two antagonistic chromatin factors to establish single-neuron sexual dimorphism.  
807 *Cell*. doi:10.1016/j.cell.2012.04.025
- 808 Ito H, Sato K, Yamamoto D. 2013. Sex-switching of the *Drosophila* brain by two antagonistic  
809 chromatin factors. *Fly (Austin)* **7**:87–91. doi:10.4161/fly.24018
- 810 Johnson O, Becnel J, Nichols CD. 2011. Serotonin receptor activity is necessary for olfactory  
811 learning and memory in *Drosophila melanogaster*. *Neuroscience*.  
812 doi:10.1016/j.neuroscience.2011.06.058
- 813 Johnson O, Becnel J, Nichols CD. 2009. Serotonin 5-HT<sub>2</sub> and 5-HT<sub>1A</sub>-like receptors  
814 differentially modulate aggressive behaviors in *Drosophila melanogaster*. *Neuroscience*  
815 **158**:1292–1300. doi:10.1016/j.neuroscience.2008.10.055
- 816 Khlebodarova TM, Gruntenko NE, Grenback LG, Sukhanova MZ, Mazurov MM, Rauschenbach  
817 IY, Tomas BA, Hammock BD. 1996. A comparative analysis of juvenile hormone  
818 metabolizing enzymes in two species of *Drosophila* during development. *Insect Biochem*  
819 *Mol Biol* **26**:829–835. doi:10.1016/S0965-1748(96)00043-4
- 820 Kurtovic A, Widmer A, Dickson BJ. 2007. A single class of olfactory neurons mediates  
821 behavioural responses to a *Drosophila* sex pheromone. *Nature* **446**:542–546.  
822 doi:nature05672 [pii]10.1038/nature05672
- 823 Lee G, Foss M, Goodwin SF, Carlo T, Taylor BJ, Hall JC. 2000. Spatial, temporal, and sexually  
824 dimorphic expression patterns of the fruitless gene in the *Drosophila* central nervous  
825 system. *J Neurobiol* **43**:404–426. doi:10.1002/1097-4695(20000615)43:4<404::AID-  
826 NEU8>3.0.CO;2-D [pii]
- 827 Li H, Li T, Horns F, Li J, Xie Q, Xu C, Wu B, Keschull JM, McLaughlin CN, Kolluru SS, Jones  
828 RC, Vacek D, Xie A, Luginbuhl DJ, Quake SR, Luo L. 2020. Single-Cell Transcriptomes

- 829           Reveal Diverse Regulatory Strategies for Olfactory Receptor Expression and Axon  
830           Targeting. *Curr Biol* **30**:1189-1198.e5. doi:10.1016/j.cub.2020.01.049
- 831   Li Q, Barish S, Okuwa S, Maciejewski A, Brandt AT, Reinhold D, Jones CD, Volkan PC. 2016. A  
832           Functionally Conserved Gene Regulatory Network Module Governing Olfactory Neuron  
833           Diversity. *PLoS Genet* **12**:e1005780. doi:10.1371/journal.pgen.1005780
- 834   Lin HH, Cao DS, Sethi S, Zeng Z, Chin JS, Chakraborty TS, Shepherd AK, Nguyen CA, Yew  
835           JY, Su CY, Wang JW. 2016. Hormonal Modulation of Pheromone Detection Enhances  
836           Male Courtship Success. *Neuron* **90**:1272–1285. doi:10.1016/j.neuron.2016.05.004
- 837   Liu W, Liang X, Gong J, Yang Z, Zhang YH, Zhang JX, Rao Y. 2011. Social regulation of  
838           aggression by pheromonal activation of Or65a olfactory neurons in Drosophila. *Nat*  
839           *Neurosci* **14**. doi:10.1038/nn.2836
- 840   Liu Z, Li X, Prasifka JR, Jurenka R, Bonning BC. 2008. Overexpression of Drosophila juvenile  
841           hormone esterase binding protein results in anti-JH effects and reduced pheromone  
842           abundance. *Gen Comp Endocrinol*. doi:10.1016/j.yggen.2008.01.006
- 843   McGowan PO, Sasaki A, D'Alessio AC, Dymov S, Labonte B, Szyf M, Turecki G, Meaney MJ.  
844           2009. Epigenetic regulation of the glucocorticoid receptor in human brain associates with  
845           childhood abuse. *Nat Neurosci* **12**:342–348. doi:10.1038/nn.2270
- 846   McLaughlin CN, Brbić M, Xie Q, Li T, Horns F, Kolluru SS, Kebschull JM, Vacek D, Xie A, Li J,  
847           Jones RC, Leskovec J, Quake SR, Luo L, Li H. 2021. Single-cell transcriptomes of  
848           developing and adult olfactory receptor neurons in drosophila. *Elife* **10**.  
849           doi:10.7554/eLife.63856
- 850   Meier N, Kappeli SC, Hediger Niessen M, Billeter JC, Goodwin SF, Bopp D. 2013. Genetic  
851           control of courtship behavior in the housefly: evidence for a conserved bifurcation of the

- 852 sex-determining pathway. *PLoS One* **8**:e62476. doi:10.1371/journal.pone.0062476
- 853 Mellert DJ, Knapp JM, Manoli DS, Meissner GW, Baker BS. 2010. Midline crossing by gustatory  
854 receptor neuron axons is regulated by fruitless, doublesex and the Roundabout receptors.  
855 *Development* **137**:323–332. doi:10.1242/dev.045047
- 856 Mifsud KR, Gutierrez-Mecinas M, Trollope AF, Collins A, Saunderson EA, Reul JM. 2011.  
857 Epigenetic mechanisms in stress and adaptation. *Brain Behav Immun* **25**:1305–1315.  
858 doi:10.1016/j.bbi.2011.06.005
- 859 Mohamed AAM, Retzke T, Das Chakraborty S, Fabian B, Hansson BS, Knaden M, Sachse S.  
860 2019. Odor mixtures of opposing valence unveil inter-glomerular crosstalk in the  
861 *Drosophila* antennal lobe. *Nat Commun* **10**. doi:10.1038/s41467-019-09069-1
- 862 Naftelberg S, Schor IE, Ast G, Kornblihtt AR. 2015. Regulation of alternative splicing through  
863 coupling with transcription and chromatin structure. *Annu Rev Biochem*.  
864 doi:10.1146/annurev-biochem-060614-034242
- 865 Neville MC, Nojima T, Ashley E, Parker DJ, Walker J, Southall T, Van de Sande B, Marques  
866 AC, Fischer B, Brand AH, Russell S, Ritchie MG, Aerts S, Goodwin SF. 2014. Male-  
867 specific fruitless isoforms target neurodevelopmental genes to specify a sexually dimorphic  
868 nervous system. *Curr Biol* **24**:229–241. doi:10.1016/j.cub.2013.11.035
- 869 Ng R, Salem SS, Wu ST, Wu M, Lin HH, Shepherd AK, Joiner WJ, Wang JW, Su CY. 2019.  
870 Amplification of *Drosophila* Olfactory Responses by a DEG/ENaC Channel. *Neuron*.  
871 doi:10.1016/j.neuron.2019.08.041
- 872 Nojima T, Neville MC, Goodwin SF. 2014. Fruitless isoforms and target genes specify the  
873 sexually dimorphic nervous system underlying *Drosophila* reproductive behavior. *Fly*  
874 (*Austin*) **8**.



- 875 Olsen SR, Bhandawat V, Wilson RI. 2007. Excitatory Interactions between Olfactory Processing  
876 Channels in the Drosophila Antennal Lobe. *Neuron* **54**. doi:10.1016/j.neuron.2007.03.010
- 877 Pikielny CW. 2012. Sexy DEG/ENaC channels involved in gustatory detection of fruit fly  
878 pheromones. *Sci Signal*. doi:10.1126/scisignal.2003555
- 879 Root CM, Masuyama K, Green DS, Enell LE, Nassel DR, Lee CH, Wang JW. 2008. A  
880 presynaptic gain control mechanism fine-tunes olfactory behavior. *Neuron* **59**:311–321.  
881 doi:S0896-6273(08)00572-2 [pii]10.1016/j.neuron.2008.07.003
- 882 Ryner LC, Goodwin SF, Castrillon DH, Anand A, Vilella A, Baker BS, Hall JC, Taylor BJ,  
883 Wasserman SA. 1996. Control of male sexual behavior and sexual orientation in  
884 Drosophila by the fruitless gene. *Cell*. doi:10.1016/S0092-8674(00)81802-4
- 885 Sato K, Yamamoto D. 2020. The mode of action of Fruitless: Is it an easy matter to switch the  
886 sex? *Genes, Brain Behav*. doi:10.1111/gbb.12606
- 887 Scanlan JL, Gledhill-Smith RS, Battlay P, Robin C. 2020. Genomic and transcriptomic analyses  
888 in Drosophila suggest that the ecdysteroid kinase-like (EcKL) gene family encodes the  
889 ‘detoxification-by-phosphorylation’ enzymes of insects. *Insect Biochem Mol Biol* **123**.  
890 doi:10.1016/j.ibmb.2020.103429
- 891 Seong KM, Coates BS, Berenbaum MR, Clark JM, Pittendrigh BR. 2018. Comparative CYP-  
892 omic analysis between the DDT-susceptible and -resistant Drosophila melanogaster strains  
893 91-C and 91-R. *Pest Manag Sci* **74**. doi:10.1002/ps.4936
- 894 Seong KM, Coates BS, Pittendrigh BR. 2019. Cytochrome P450s Cyp4p1 and Cyp4p2  
895 associated with the DDT tolerance in the Drosophila melanogaster strain 91-R. *Pestic  
896 Biochem Physiol* **159**. doi:10.1016/j.pestbp.2019.06.008
- 897 Sethi S, Lin HH, Shepherd AK, Volkan PC, Su CY, Wang JW. 2019. Social Context Enhances

- 898 Hormonal Modulation of Pheromone Detection in *Drosophila*. *Curr Biol* **29**:3887–3898.  
899 doi:10.1016/j.cub.2019.09.045
- 900 Sizemore TR, Dacks AM. 2016. Serotonergic Modulation Differentially Targets Distinct Network  
901 Elements within the Antennal Lobe of *Drosophila melanogaster*. *Sci Rep* **6**.  
902 doi:10.1038/srep37119
- 903 Sudhakaran IP, Holohan EE, Osman S, Rodrigues V, Vijay Raghavan K, Ramaswami M. 2012.  
904 Plasticity of recurrent inhibition in the *Drosophila* antennal lobe. *J Neurosci* **32**:7225–7231.  
905 doi:10.1523/JNEUROSCI.1099-12.2012
- 906 Suzuki Y, Schenk JE, Tan H, Gaudry Q. 2020. A Population of Interneurons Signals Changes in  
907 the Basal Concentration of Serotonin and Mediates Gain Control in the *Drosophila*  
908 Antennal Lobe. *Curr Biol*. doi:10.1016/j.cub.2020.01.018
- 909 Usui-Aoki K, Ito H, Ui-Tei K, Takahashi K, Lukacsovich T, Awano W, Nakata H, Piao ZF,  
910 Nilsson EE, Tomida J, Yamamoto D. 2000. Formation of the male-specific muscle in  
911 female *Drosophila* by ectopic fruitless expression. *Nat Cell Biol* **2**:500–506.  
912 doi:10.1038/35019537
- 913 van der Goes van Naters W, Carlson JR. 2007. Receptors and neurons for fly odors in  
914 *Drosophila*. *Curr Biol* **17**:606–612. doi:S0960-9822(07)01020-2  
915 [pii]10.1016/j.cub.2007.02.043
- 916 Vernes SC. 2014. Genome wide identification of Fruitless targets suggests a role in  
917 upregulating genes important for neural circuit formation. *Sci Rep*. doi:10.1038/srep04412
- 918 Von Philipsborn AC, Jörchel S, Tirian L, Demir E, Morita T, Stern DL, Dickson BJ. 2014. Cellular  
919 and behavioral functions of fruitless isoforms in *Drosophila* courtship. *Curr Biol*.  
920 doi:10.1016/j.cub.2013.12.015

- 921 Wang JW, Wong AM, Flores J, Vosshall LB, Axel R. 2003. Two-photon calcium imaging reveals  
922 an odor-evoked map of activity in the fly brain. *Cell* **112**. doi:10.1016/S0092-  
923 8674(03)00004-7
- 924 Wang L, Dankert H, Perona P, Anderson DJ. 2008. A common genetic target for environmental  
925 and heritable influences on aggressiveness in *Drosophila*. *Proc Natl Acad Sci U S A*.  
926 doi:10.1073/pnas.0801327105
- 927 Wang L, Han X, Mehren J, Hiroi M, Billeter JC, Miyamoto T, Amrein H, Levine JD, Anderson DJ.  
928 2011. Hierarchical chemosensory regulation of male-male social interactions in *Drosophila*.  
929 *Nat Neurosci* **14**:757–762. doi:nn.2800 [pii]10.1038/nn.2800
- 930 Weaver IC, Cervoni N, Champagne FA, D’Alessio AC, Sharma S, Seckl JR, Dymov S, Szyf M,  
931 Meaney MJ. 2004. Epigenetic programming by maternal behavior. *Nat Neurosci* **7**:847–  
932 854. doi:10.1038/nn1276
- 933 West AE, Greenberg ME. 2011. Neuronal activity-regulated gene transcription in synapse  
934 development and cognitive function. *Cold Spring Harb Perspect Biol* **3**.  
935 doi:cshperspect.a005744 [pii]10.1101/cshperspect.a005744
- 936 Wilson RI. 2013. Early olfactory processing in *Drosophila*: Mechanisms and principles. *Annu*  
937 *Rev Neurosci*. doi:10.1146/annurev-neuro-062111-150533
- 938 Wong AM, Wang JW, Axel R. 2002. Spatial representation of the glomerular map in the  
939 *Drosophila* protocerebrum. *Cell* **109**. doi:10.1016/S0092-8674(02)00707-9
- 940 Yamamoto D. 2007. The neural and genetic substrates of sexual behavior in *Drosophila*. *Adv*  
941 *Genet* **59**:39–66. doi:10.1016/S0065-2660(07)59002-4
- 942 Yamamoto D, Koganezawa M. 2013. Genes and circuits of courtship behaviour in *Drosophila*  
943 males. *Nat Rev Neurosci* **14**:681–692. doi:10.1038/nrn3567

- 944 Yamamoto D, Kohatsu S. 2017. What does the fruitless gene tell us about nature vs. nurture in  
945 the sex life of *Drosophila*? *Fly (Austin)*. doi:10.1080/19336934.2016.1263778
- 946 Yamamoto D, Kohatsu S, Koganezawa M. 2013. Insect pheromone behavior: fruit fly. *Methods*  
947 *Mol Biol* **1068**:261–272. doi:10.1007/978-1-62703-619-1\_19
- 948 Yan H, Jafari S, Pask G, Zhou X, Reinberg D, Desplan C. 2020. Evolution, developmental  
949 expression and function of odorant receptors in insects. *J Exp Biol*. doi:10.1242/jeb.208215
- 950 Zhang X, Coates K, Dacks A, Günay C, Lauritzen JS, Li F, Calle-Schuler SA, Bock D, Gaudry  
951 Q. 2019. Local synaptic inputs support opposing, network-specific odor representations in  
952 a widely projecting modulatory neuron. *Elife* **8**. doi:10.7554/eLife.46839
- 953 Zhang Y, Ng R, Neville MC, Goodwin SF, Su CY. 2020. Distinct Roles and Synergistic Function  
954 of FruM Isoforms in *Drosophila* Olfactory Receptor Neurons. *Cell Rep* **33**.  
955 doi:10.1016/j.celrep.2020.108516
- 956 Zhang Y, Su C-Y. 2020. Distinct Roles and Synergistic Function of Fru<sup>M</sup> Isoforms in *Drosophila*  
957 Olfactory Receptor Neurons. *SSRN Electron J*. doi:10.2139/ssrn.3624384
- 958 Zhao S, Deanhardt B, Barlow GT, Schleske PG, Rossi AM, Volkan PC. 2020. Chromatin-based  
959 reprogramming of a courtship regulator by concurrent pheromone perception and hormone  
960 signaling. *Sci Adv* **6**:eaba6913. doi:10.1126/sciadv.aba6913
- 961 zur Lage PI, Prentice DR, Holohan EE, Jarman AP. 2003. The *Drosophila* proneural gene *amos*  
962 promotes olfactory sensillum formation and suppresses bristle formation. *Development*  
963 **130**:4683–4693. doi:10.1242/dev.00680130/19/4683 [pii]
- 964
